1 **The essential role played by B cells in supporting protective immunity against *Trichuris***  
2 ***muris* infection is dependent on host genetic background and is independent of antibody**

3 Rinal Sahputra<sup>‡</sup>, Dominik Ruckerl, Kevin Couper, Werner Muller, Kathryn J Else<sup>‡</sup>

4 Lydia Becker Institute for Immunology, The University of Manchester

5

6 <sup>‡</sup>Joint corresponding authors

7 Email: [Kathryn.j.else@manchester.ac.uk](mailto:Kathryn.j.else@manchester.ac.uk)

8 [Rinal.sahputra@manchester.ac.uk](mailto:Rinal.sahputra@manchester.ac.uk)

9

10

11 **Abstract**

12 This study investigates the role of B cells in immunity to *Trichuris muris* (*T. muris*)  
13 infection in two genetically distinct strains of mouse, using anti-CD20 monoclonal antibody  
14 (mAb) (Genentech-clone 5D2) to deplete B cells. Data is presented for the mouse strains:  
15 C57BL/6 and BALB/c, which mount mixed Th1/Th2, and highly polarised Th2 immune  
16 responses to *T. muris*, respectively. C57BL/6 mice receiving anti-CD20 treatment prior to  
17 and during, or anti-CD20 treatment that commenced two weeks post infection (p.i.), were  
18 susceptible to *T. muris*. Parasite-specific IgG1 antibodies were absent and Th2 type cytokines  
19 produced by mesenteric lymph nodes cells from mice receiving  $\alpha$ -CD20 mAb treatment were  
20 significantly lower than produced by cells from isotype control treated mice. T follicular  
21 helper cells were also significantly reduced. Importantly, and in complete contrast, BALB/c  
22 mice were still able to expel *T.muris* in the absence of B cells, revealing that the essential role  
23 played by B cells in protective immunity was dependent on genetic background. To explore  
24 whether the important role played by the B cell in the protective immune response of  
25 C57BL/6 mice was in enabling strong Th2 responses in the presence of IFN- $\gamma$ , IFN- $\gamma$  was

26 blocked using anti-IFN- $\gamma$  mAb post B cell depletion. Depleting IFN- $\gamma$ , in the absence of B  
27 cells restored worm expulsion in the absence of parasite-specific IgG1/IgG2c and partially  
28 rescued the *T. muris* specific IL-13 response. Thus, our data suggest an important, antibody  
29 independent role for B cells in supporting Th2 type immune responses in mixed IFN- $\gamma$ -rich  
30 Th1/Th2 immune response settings.

31

### 32 **Author summary**

33 How B cells contribute to protective immunity against parasitic nematodes remains  
34 unclear, with their importance as accessory cells under-explored. This study reveals that, on  
35 some genetic backgrounds, B cells are important for the expulsion of *T. muris* by acting as  
36 accessory cells, supporting Th2 immune responses.

37

## 38 Introduction

39 Infecting over two billion people around the world, mostly in resource-limited  
40 countries, the ability of parasitic helminths to maintain long standing chronic infections  
41 makes them a major health care issue (1). *Trichuris trichiura* (*T. trichiura*) is one of the most  
42 common gastrointestinal nematodes, infecting approximately 465 million people worldwide  
43 (2), primarily children. In infected children, trichuriasis is strongly associated to malnutrition,  
44 growth stunting, and intellectual retardation; whereas in pregnant adults it is related to  
45 anaemia and low birth weight babies (3).

46 For decades, *T. muris* in the mouse has provided a useful and relevant model system  
47 with which to explore immunity to *T. trichiura* in man. Infection of mice with intestinal  
48 nematode parasite *T. muris* drives polarized T helper cell (Th) responses which associate with  
49 resistance (Th2) or susceptibility (Th1). However, the key cellular contributions which  
50 support Th2 cell polarization during *T. muris* infection are still not well understood. One of  
51 the cells thought to be important is the B cell. It is well established that B cell function is not  
52 only related to antibody production, but B cells can also act as antigen presenting cells  
53 (APCs) due to the expression of MHC class II molecules and several co-stimulators,  
54 including CD40, CD80, and CD86 on its surface (4-6), and as accessory cells, acting as a  
55 cellular source of multiple cytokines (7).

56 B cells are well placed to act as accessory cells as they are able to influence CD4 T  
57 cells polarisation. For example, previous studies have shown that CD4 T cells produce  
58 significantly more IL-4 when stimulated with antigen presented by B cells compared to  
59 macrophages (8). In addition, B cells have been shown to produce either Th1 or Th2 type  
60 cytokines *in vivo* depending on the type of parasite. Thus, for the Th1 driving parasite  
61 *Toxoplasma gondii*, B cells produce IFN- $\gamma$  and IL-12p40 (9); whilst in the context of the Th2  
62 polarising parasite *Heligmosomoides polygyrus* (*H. polygyrus*), B cells produce IL-4 and IL-2

63 (10, 11). Recent studies reported that IL-4 producing B cells during early infection of  
64 *Schistosoma mansoni* (*S. mansoni*) are critical for Th2 polarisation, protecting the host  
65 against *S. mansoni*-induced pathology (12). B cells can also influence T cell polarisation  
66 towards Th2 response by providing co-stimulatory molecules. Linton *et al.*, (13) showed that  
67 co-stimulation via OX40L expressed by B cells is essential for T cell polarisation towards  
68 Th2 cells. Likewise, both CD80 and CD86 co-stimulatory molecules expressed by B cells, as  
69 well as other APC, are required for the Th2 response during *H. polygyrus* infection (14).

70         Recently, it was suggested that B cells, together with T cells and DCs are required not  
71 only to optimize the development of Th2 type responses, but also to maintain T follicular  
72 helper (T<sub>FH</sub>) and memory Th2 cells development following *H. polygyrus* infection (15). Thus,  
73 Leon *et al.* (15) showed that the deletion of CXCR5 on either DC or CD4 T cells, during *H.*  
74 *polygyrus*-infection of C57BL/6 mice, impaired the development of T<sub>FH</sub> and Th2 cells by  
75 impairing the migration of CXCR5+ cells towards the B cell follicle in response to CXCL13.  
76 Interestingly, B cell depletion also impaired Th2 responses (15).

77         Previous studies suggested that B cells and antibody are not important in mediating  
78 resistance following a primary *T. muris* infection (16-18). Since then, many different studies  
79 have been performed to show the importance of CD4 T cells in mediating resistance against  
80 *T. muris* (19-21). By contrast, the role of B cells in immunity to *T. muris* remains largely  
81 unexplored. *T. muris*-infected  $\mu$ MT mice on a C57BL6 background develop Th-1 type  
82 responses, resulting in the susceptibility to *T. muris* infection (22). These susceptible *T.*  
83 *muris*-infected  $\mu$ MT C57BL6 mice produced high IFN- $\gamma$ , without any Th2 cytokines  
84 production. Furthermore, when these mice were treated with B cells from naive C57BL6 or  
85 with anti-IL-12 antibody, resistance to infection was restored (22). This suggests that B cells  
86 are important in either inhibiting Th1 development or supporting Th2 type immune

87 responses. However, given the importance of B cells in the development of lymph nodes and  
88 tissue organisation (23, 24), data from  $\mu$ MT mice is difficult to interpret.

89         This study therefore investigates the role of B cells and antibodies in immunity to *T.*  
90 *muris* infection using anti-CD20 monoclonal antibody (mAb) to deplete B cells from mice of  
91 two distinct genetic backgrounds, C57BL/6 and BALB/c. The benefit of using anti-CD20  
92 mAb is that it allows depletion of CD19<sup>+</sup> cells either prior to or post infection and avoids the  
93 complicating consequences of B cell deficiency during embryonic development. We  
94 demonstrate that B cells are important in the protective immune response to *T. muris*; that the  
95 role played by the B cell is antibody-independent; and that the importance of the B cell varies  
96 with genetic background of the host. Thus the B cell plays an essential role in supporting Th2  
97 type immune responses only in mixed Th1/Th2 IFN- $\gamma$  rich settings, as seen in C57BL/6 mice,  
98 and is redundant in the highly Th2 polarised, IFN- $\gamma$ -deficient environment of the BALB/c  
99 mouse post *T. muris* infection.

100

101

## 102 **Results**

### 103 2.1 Depletion of B cells throughout infection requires two injections of anti-CD20 mAb

104 As a transmembrane calcium channel, CD20 is important in B cell activation,  
105 proliferation, and differentiation (25). The CD20 molecule is normally expressed on the  
106 surface of B cells during the late pre-B cell. Therefore, the injection of anti-CD20 mAb will  
107 deplete all B cells, except early pre-B cells and plasma cells (26). The vast majority of IgM<sup>+</sup>  
108 or B220<sup>+</sup> cells in the spleen, lymph nodes, peritoneal cavity, and blood express CD20, whilst  
109 in bone marrow the expression of CD20 increases with B cell maturation (27). Previous  
110 studies showed that anti-CD20 effectively depleted B cells either via complement-mediated  
111 lysis of target cells (28) or by inducing FcγR-mediated clearance (Ab-dependent cell  
112 mediated cytotoxicity) (29). Furthermore, a single dose of anti-CD20 treatment prior to  
113 lymphocytic choriomeningitis virus infection depleted B cell populations for up to 45 days  
114 (30). However, the current study showed that a single anti-CD20 injection failed to ablate B  
115 cells for the full duration of *T. muris* infection, with a clear CD19<sup>+</sup> population re-emerging in  
116 the MLNs, spleen, and blood by day 35 p.i. (Fig. 1A&B). Therefore, a second anti-CD20  
117 injection was administered at day 10 p.i. in order to maintain B cell depletion in the blood  
118 and secondary lymphoid organs throughout infection (Fig. 1A&B). CD19<sup>+</sup> cells were still  
119 present in the bone marrow after anti-CD20 treatment (Fig. 1B), however these CD19<sup>+</sup> cells  
120 were pro-B cells (Fig. 1C) as has been shown previously (26).

121

### 122 2.2 C57BL/6 mice treated with anti-CD20 mAb fail to expel *T. muris* by d35 p.i., correlates 123 with an absence of class switched antibodies and a significant decrease in Th2 cytokines

124 To investigate whether B cells are important in resistance against *T. muris* during  
125 primary infection of C57BL/6 mice, mice were injected with anti-CD20 mAb 7 days prior to  
126 infection and 10 days post infection. Chronic infection, characterised by persisting adult stage

127 parasites from day 32 p. i. defines susceptibility (22). Thus, autopsies were performed beyond  
128 this time point. The experimental design is shown in Fig. 2A. Previous studies have shown  
129 that C57BL/6 mice take up to 35 days to completely expel the parasite (31). As shown in Fig.  
130 2B, C57BL/6 depleted of B cells were significantly more susceptible to infection than control  
131 treated mice.

132 It has previously been shown that IgG1 antibodies are associated with resistance to *T.*  
133 *muris* infection, whilst IgG2c antibodies are related to susceptibility (32). Therefore, the  
134 levels of parasite specific antibodies in the sera of anti-CD20 treated mice and isotype control  
135 treated mice were compared. Mice depleted of B cells using anti-CD20 mAb failed to secrete  
136 IgG1 and IgG2c parasite specific antibodies, in contrast to control treated mice (Fig. 2C&D).  
137 Further, the levels of *T. muris* specific IgM antibodies in the sera of anti-CD20 treated mice  
138 were significantly lower than in the sera of the isotype control-treated mice (Fig. 2E). These  
139 effects of B cell depletion on antigen-specific IgG and IgM antibodies are consistent with  
140 reports in other model systems (33).

141 In common with other nematode parasites, hosts resistant to *T. muris* mount Th-2  
142 immune responses characterised by the production of IL-4, IL-5, IL-9 and IL-13; in contrast,  
143 mice susceptible to *T. muris* mount a Th-1 type response, dominated by the release of IFN- $\gamma$   
144 (32, 34, 35). B cell depleted mice on a C57BL/6 background produced significantly lower  
145 Th2 cytokines, including IL-5, IL-9, and IL-13 compared to mice treated with the isotype  
146 control (Fig. 2F-H). Interestingly, the production of IFN- $\gamma$  and IL-17 was similar in both  
147 groups (Fig. 2I&J) suggesting that B cells do not affect Th1 development but rather boost  
148 Th2 responses. These data are in keeping with the previous study by Leon, *et al.*, which  
149 revealed that B cell depletion impaired the development Th2 in mice against *H. polygyrus*  
150 infection (15).

151

152 2.3 B cell depletion reduced the T<sub>FH</sub> population and altered DC subsets in the MLN

153 The importance of B cells for the formation of T<sub>FH</sub> has been shown previously in both  
154 mouse (15) and man (36). In keeping with these studies, the MLN T<sub>FH</sub> population of anti-  
155 CD20 treated mice in C57BL/6 genetic background was significantly reduced compared to  
156 isotype control treated mice (Fig. 3A-C). Gating strategy was shown in Supplementary Fig. 1.  
157 In contrast, T<sub>FH</sub> development in the spleen, distal to the site of infection, was not significantly  
158 affected by B cell depletion (Supplementary Fig.2), although the lack of statistical  
159 significance may be due to the high variability in the control mice.

160 Previous studies have suggested that CD11b<sup>+</sup> DCs in MLNs might be important for  
161 promoting Th2 immune responses against *T. muris* infection (37). Because Th2 cytokines  
162 were significantly reduced in the MLNs from anti-CD20 treated mice during *T. muris*  
163 infection, DC subsets in MLNs were analysed (Fig. 3D-H). The gating strategy is shown in  
164 Supplementary Fig. 3. Total cell number of CD103<sup>-</sup>CD11b<sup>+</sup> DCs (Fig. 3F) and CD103<sup>+</sup>  
165 CD11b<sup>+</sup> DCs (Fig. 3H) were significantly reduced in MLNs of anti-CD20 treated mice  
166 compared to isotype control treated mice.

167

168 2.4 B cell depletion from day 14 post infection also altered the worm burden

169 As depletion of B cells throughout the course of infection of C57BL/6 mice lead to  
170 susceptibility to *T. muris*, we wondered whether B cell depletion from day 14 p.i. would also  
171 alter the phenotype. Previous studies on the expulsion kinetics of *T. muris* have shown that  
172 the onset of worm expulsion occurs after day 12 p.i., with T cell activation occurring after the  
173 first 7 days (38). Therefore, B cells were depleted 2 weeks post *T. muris* infection to see if  
174 this still impacted on the ability to expel the parasite. The experimental design is shown in  
175 Fig. 4A. Surprisingly, the depletion of B cells from day 14 p.i. also impaired worm expulsion  
176 with significantly more parasites present at day 35 p.i. than seen in control-treated mice (Fig.



177 4B). T<sub>FH</sub> cells and Th2 type cytokines, including IL-5, IL-9, and IL-13 were also significantly  
178 reduced in the absence of B cells (Fig. 4C-H). Interestingly, TNF- $\alpha$  was significantly  
179 increased in B cell depleted mice (Fig. 4I), whilst IFN- $\gamma$  and IL-17A remained the same  
180 between groups (Fig. 4J&K). These data suggest that the B cell plays an important role in  
181 maintaining Th2 responses.

182

183 2.5 Anti-IFN- $\gamma$  treatment partially restored IL-13 production in B cell depleted mice and  
184 rescued worm expulsion

185 In order to investigate whether the impaired resistance to infection in the absence of B  
186 cells was due to the reduced Th2 immune response or loss of parasite specific antibodies, B  
187 cell depleted mice were injected with anti-IFN- $\gamma$ . Anti-IFN- $\gamma$  treatment is a common strategy  
188 to promote resistance in susceptible mice (39). The experimental design for anti-IFN- $\gamma$   
189 injection plus B cell depletion is shown in Fig. 5A. As shown in Fig. 5B, anti-IFN- $\gamma$  treatment  
190 restored resistance to *T. muris* in B cell depleted mice.

191 As expected, blocking IFN- $\gamma$  in the absence of B cells did not rescue the *T. muris*  
192 specific IgG1 response (Fig. 5C). *T. muris* specific IgG2c antibodies were not detected in the  
193 sera of anti-IFN- $\gamma$  treated mice with intact B cells (Fig. 5D), consistent with a highly  
194 polarised Th2 immune response. In contrast, the isotype control mice produced both IgG1  
195 and IgG2c antibodies (Fig. 5C&D). Consistent with our previous data, mice treated with anti-  
196 CD20 mAb produced significantly lower Th2 cytokines, such as, IL-13, IL-4, IL-5 and IL-9  
197 compared to isotype control treated mice (Fig. 5D-G) with the Th1 response unaffected (data  
198 not shown). Importantly, blocking IFN- $\gamma$  significantly increased IL-13 production in mice  
199 depleted of B cells (Fig. 5D), although levels were still significantly lower than in isotype  
200 control treated mice (Fig. 5D). Although no significant difference was noted in the  
201 production of other Th2 type cytokines, there were trends towards increased *T. muris* specific

202 IL-4, IL-5, and IL-9 after anti-IFN- $\gamma$  treatment in B cell depleted mice compared to mice  
203 depleted of B cells but not IFN- $\gamma$  (Fig. 5F-H). Taken together, these results show that in the  
204 absence of IFN- $\gamma$ , B cells and IgG1 parasite specific antibodies are not important for *T. muris*  
205 expulsion on a C57BL/6 genetic background; thus without any competing IFN- $\gamma$  partial  
206 restoration of the Th2 immune response is sufficient to render animals resistant to infection

207 Consistent with data in Fig 4, B cell depletion reduced the T<sub>FH</sub> population in MLNs  
208 (Fig. 5I&J). T<sub>FH</sub> cells have been associated with Th2 immunity due to their ability to secrete  
209 IL-4, a Th2 signature cytokine (33, 40, 41). Given that IL-13 production persisted in B cell  
210 depleted mice after anti-IFN- $\gamma$  injection, we wondered whether the T<sub>FH</sub> population was also  
211 altered. Anti-IFN- $\gamma$  treatment did not restore the T<sub>FH</sub> population in MLNs of anti-CD20  
212 treated mice at day 21 p.i. (Fig. 5I&J), however it remains a possibility that the few T<sub>FH</sub>  
213 remaining were sufficient to induce the partial Th2 response.

214

215 2.6 B cells are essential in supporting Th2 immune responses against *T. muris* only in an IFN-  
216  $\gamma$ -rich environment.

217 In the current study we found that when C57BL/6 mice were depleted of IFN- $\gamma$ , the  
218 immune response became more highly polarised towards Th2 mice, evidenced by parasite-  
219 specific IgG1 antibodies, in the absence of IgG2c. In this more polarised Th2 environment  
220 the depletion of B cells did not prevent worm expulsion. These data suggest that the  
221 important role played by B cells in supporting Th2 immune responses against *T. muris* is only  
222 necessary in IFN- $\gamma$ -rich environments. Therefore, we decided to deplete B cells in BALB/c  
223 mice, which are naturally very resistant to *T. muris* and mount highly polarised Th2 immune  
224 responses in the absence of IgG2a/c and IFN- $\gamma$  (31). The experimental design is shown in  
225 Fig. 6A. CD19<sup>+</sup> cells in MLNs, spleen, and PerC of BALB/c mice were not detected after  
226 anti-CD20 mAb injection (Fig. 6B). In complete contrast to B cell depleted C57BL/6 mice,

227 BALB/c mice were still able to expel the parasite in the absence of B cells (Fig. 6C). IgG1  
228 and IgG2c parasite specific antibodies were undetectable in B cell depleted mice (Fig.  
229 6D&E), and levels of *T. muris* specific IgM were significantly lower than in the sera of  
230 isotype control treated mice (Fig. 6F). As shown previously (31, 39), isotype control treated  
231 mice on BALB/c genetic background mounted a strong parasite specific IgG1 response but  
232 did not secrete *T. muris*-specific IgG2a/c (Fig. 3K), indicative of a highly polarised Th2  
233 immune response.

234 Collectively, our data reveals that the important role played by the B cell in promoting  
235 resistance to *T. muris* infection in mixed Th1/Th2 cytokine settings is in supporting the  
236 development and maintenance of the Th2 immune response and is not related to antibody  
237 production. Importantly, the essential role played by the B cell in the protective immune  
238 response varied with genetic background and the degree of Th cell polarisation of the host.  
239 Thus, if IFN- $\gamma$  is depleted from mixed Th1/Th2 settings, or the Th2 immune response is  
240 dominant, the B cell becomes redundant in the protective immune response.

241

## 242 Discussion

243 *T. muris* infection drives different Th cell responses in different strains of mice (34).  
244 BALB/c, BALB/k, and NIH mice are very resistant to *T. muris* infection, expelling the  
245 worms by around day 18 post infection, while AKR mice are susceptible to infection, unable  
246 to expel the parasite and harbour patent chronic infections (42). C57BL6 and C57BL10 mice  
247 are also resistant to infection, but they expel the worms more slowly, between day 18 and 35  
248 p.i. (43). Susceptible hosts mount predominantly Th-1 immune responses associated with the  
249 presence of IFN- $\gamma$  and IL-12, whilst very resistant host strains mount strong Th-2 type  
250 polarised immune response characterised by cytokines such as IL-4, IL-5, IL-9 and IL-13,  
251 and very low levels of IFN- $\gamma$ . The quality of the Th cell response in C57BL6 mice is less  
252 clearly polarised with the slower expulsion kinetic associated with a mixed Th1/Th2  
253 phenotype and presence of IgG1 and IgG2c. Despite a good understanding of the Th cell  
254 response during *T. muris* infection, the key cellular contributions which support T helper  
255 polarization are still not well understood, nor how genetic background impinges on this.

256 This study aimed to investigate the role of B cells in immunity to *T. muris* during  
257 primary infection by using anti-CD20 mAb to deplete B cells. In order to understand whether  
258 the contribution of the B cell varied with the nature of the protective immune response, we  
259 used mice of two different genetic backgrounds: C57BL/6 and BALB/c. CD20 is specifically  
260 expressed on the surface of B cells from the pre-B cells stage to immature B cells, but then  
261 disappear when B cells differentiate to plasma cells (28). Adding antibody against CD20  
262 inhibits the progression of B cells from the G1 phase into S/G2+ M stages (44), resulting in  
263 the inhibition of B cell differentiation, antibody production, and inducing B cell apoptosis  
264 (45). Using anti-CD20 mediated depletion of B cells, antigen specific class switched  
265 antibodies are ablated and IgM antibodies are significantly reduced (41, 46). These finding

266 are in keeping with the finding of current study and enable an assessment of the importance  
267 of parasite-specific IgG1 antibodies in the expulsion of *T. muris*.

268 Our data reveal that antibody is not essential for the expulsion of *T. muris*, with both  
269 B cell depleted BALB/c mice and B cell depleted C57BL/6 mice also depleted of IFN- $\gamma$ , able  
270 to clear infection. These data also exemplify that the mechanism of immunity to *T. muris* in  
271 BALB/c mice is entirely B cell independent. However, our data do identify an important and  
272 significant antibody-independent role for the B cell in promoting immunity to infection in  
273 mouse strains, such as C57BL/6, which are not highly polarised towards a Th2 immune  
274 response. Thus, the importance of the B cell in resistance to infection is dependent on genetic  
275 background, and represents a key consideration when interpreting data from other  
276 experimental models. Further, given that protective immunity was lost when B cells were  
277 depleted both throughout the time course of infection and only after the first two weeks of  
278 infection, our data suggest that the role played by the B cell is in supporting both the  
279 development and maintenance of Th2 immune responses.

280 Mechanistically, B cell depletion correlated with a significant reduction in  
281 CD4+CXCR5+PD-1<sup>high</sup> cells. CD4+CXCR5+PD-1<sup>high</sup> cells are recognised as T<sub>FH</sub> and are  
282 known to be able to produce the Th2-type signature cytokine; IL-4 (47). Thus, these data are  
283 consistent with previous studies showing that B cells are important in regulating Th2 immune  
284 responses (10, 14, 15, 48-51) and maintaining T<sub>FH</sub> development (15, 52). Interestingly, T<sub>FH</sub>  
285 populations in both MLN and spleen of BALB/c mice were not affected after B cell  
286 depletion. Further, the presence of T<sub>FH</sub> has been associated with Th2-type immune responses  
287 in *H. polygyrus* infection (15). Although in the current study, depletion of B cells in mice also  
288 treated with anti- IFN- $\gamma$  restored expulsion of *T. muris* without rescuing the T<sub>FH</sub> response, the  
289 few T<sub>FH</sub> cells remaining may be sufficient to support the partially restored Th2 response.

290 Thus it remains possible that T<sub>FH</sub> cells are essential in building strong Th2 responses in the  
291 absence of IFN- $\gamma$ .

292 The importance of B cells in immunity to *T. muris* has previously been proposed  
293 using  $\mu$ MT mice (22) on a C57BL/6 background which are susceptible to infection unless  
294 Th1 responses are inhibited using anti-IL-12. These data are keeping with the current study  
295 supporting a role for B cells as accessory cells promoting and maintaining Th2 responses  
296 rather than antibody producers. Antibody independent expulsion of *T. muris* is also evidenced  
297 by the fact that primed CD4<sup>+</sup> T cell transfer to SCID mice is sufficient to support worm  
298 expulsion in the absence of antibody (18).

299 More broadly, the role of B cells in immunity to gastro intestinal nematodes in  
300 general has been debated at length (53-56). Proposed mechanisms include production of  
301 antibody (57), promoting and maintaining of primary and memory Th2 cells (10, 14) via their  
302 ability to produce cytokines, especially IL-4 (11, 53, 58), and/or by expressing co-stimulatory  
303 molecules, including OX40L and CD40 (13, 59). A variety of experimental approaches have  
304 been used including the use of transgenic B cell deficient mice (10, 22, 57, 60), Fc $\gamma$ R  
305 deficiency (61, 62), passive immunization (22, 63, 64) and maternal antibody transfer (54,  
306 65); and a variety of conclusions have been drawn. IgG1 antibodies were shown to be  
307 essential for worm expulsion against *H. polygyrus* infection based on previous studies using  
308 AID mice, which retain a secretory IgM response, on C57BL/6 genetic background (57).  
309 Antibody was shown to be essential for worm expulsion against *H. polygyrus* infection via  
310 antibody-dependent cell-mediated cytotoxic (ADCC) mechanisms (66). However, ADCC  
311 mechanisms do not play a critical role in immunity to *T. muris* infection as Fc $\gamma$ R deficiency  
312 mice are still able to expel the parasite (62).

313 More recently, two studies have strongly suggested a role for B cells in directing T  
314 cell polarisation towards Th2 at the time of antigen presentation (15, 67). Leon *et al.*, showed

315 that B cell depletion in *H. polygyrus*-infected C57BL/6 mice prevented the migration of DCs  
316 into B cell areas and impaired the Th2 immune response (15). Lymphotoxin, produced by B  
317 cells, is important in the control of CXCL13 expression (15), a chemokine expressed by  
318 follicular dendritic cells (68) and marginal reticular cells in the peri and interfollicular regions  
319 between B cell follicles (69) and that is essential to attract CXCR5-expressing cells towards  
320 the B cell area (15). Thus by treating C57BL/6 mice with anti-CXCL13, Leon *et al.*, (15)  
321 also revealed that CD4 T cells and DCs accumulated in the T cell area rather than in  
322 perifollicular region and that IL-4+ Th2 cells in mesenteric lymph nodes (MLNs) were  
323 significantly reduced. In support of a mechanism involving the movement of DCs and CD4 T  
324 cells to the B cell area to allow CD4 T cells to be educated by B cells towards a Th2, recent  
325 studies have revealed that transgenic mice in which CXCR5 depletion was specifically  
326 restricted to DCs become susceptible to *T. muris* with very few DCs detected in the B cell  
327 area compared to control mice (67).

328 In addition to the proposed role for B cells in educating the DC-CD4 T cell  
329 conversation suggested by Leon *et al.*, (15) and Bradford *et al.*, (67), the importance of  
330 CD11b+ DCs in MLNs for Th2 polarisation has been shown in previous studies, against both  
331 *T. muris* (37) and *S. mansoni* (70) infection. In this context, in the current study we observed  
332 reduced numbers of CD11b+ DCs in B cell depleted C57BL/6 mice and this may contribute  
333 to the reduced Th2 immune response and increased susceptibility of anti-CD20 treated mice  
334 to *T. muris* infection. Although previous studies have indicated the importance of B cells in  
335 regulating the development of DC subsets in secondary lymphoid organs (50, 71, 72), further  
336 studies are required to investigate how the absence of B cells reduced the number of CD11b+  
337 DCs in the MLN.

338 Overall, we present a study showing that, irrespective of host genetic background,  
339 antibody is not essential in the expulsion of *T. muris*. However, our data do identify an

340 essential role played by the B cell on certain genetic backgrounds where IFN- $\gamma$  rich, mixed  
341 Th1/Th2 cell responses are observed, and strongly suggest that the B cell is able to adopt  
342 multiple functions in inducing and maintaining protective Th2 responses during gastro-  
343 intestinal nematode infection.

344



## 345 **Material and Methods**

### 346 1. Animals

347 C57BL/6 and BALB/c mice were purchased from Envigo, UK and were maintained  
348 in ventilated cages in the Biological Services Facilities (BSF) of the University of  
349 Manchester. Mice were housed in the facility at least 7 days prior to experimentation and  
350 were infected at 6-8 weeks old with *T. muris* by oral gavage.

351

### 352 2. B cells depletion and infection

353 To assess the importance of B cells for worm expulsion in different strains, C57BL/6  
354 and BALB/c mice were split into 2 groups of 4-5 mice: anti-CD20 mAb and isotype control  
355 treated mice. C57BL/6 or BALB/c mice were treated with 100µg in 200µl PBS of anti-CD20  
356 mAb (5D2, Genentech) or isotype control (Rat IgG2a, Biolegend) i.v. injection via tail vein.  
357 Mice were infected with approximately 200 *T. muris* eggs at day 7 post injection. Mice were  
358 re-injected with anti-CD20 mAb or isotype control at day 10 p.i. C57BL/6 mice were  
359 autopsied at day 35 p.i., whilst BALB/c mice were autopsied at day 42 p.i. For anti-IFN-γ,  
360 C57BL/6 mice were split into 4 groups of 5 mice: isotype control of anti-CD20 mAb +  
361 isotype control of anti-IFN-γ mAb (rat Ig), anti-CD20 mAb + isotype control of anti-IFN-γ  
362 mAb, isotype control of anti-CD20 mAb + anti-IFN-γ mAb, anti-CD20 mAb + anti-IFN-γ  
363 mAb. C57BL/6 mice were treated with 100µg in 200µl PBS of anti-CD20 mAb (5D2,  
364 Genentech) or isotype control (Rat IgG2a, Biolegend) i.v. injection via tail vein. Mice were  
365 infected by oral gavage with approximately 200 *T. muris* eggs at day 7 post injection. Mice  
366 were re-injected with anti-CD20 mAb or isotype control at day 10 p.i. 1 mg of α-IFN-γ  
367 antibody or rat IgG1 (as a control) antibody was given at day 0, day 7, and day 14 p.i. Mice  
368 were euthanised by CO2 followed by autopsy at day 21 or day 35 p.i..

369 3. *Trichuris muris* maintenance and the preparation of E/S proteins

370 All protocols to maintain the parasite and to prepare the E/S were as previously  
371 described (73). Briefly, the parasite was passaged through SCID mice that are susceptible to  
372 *T. muris* infection. SCIDs received a high dose of approximately 300 *T.muris* embryonated  
373 eggs and at approximately day 35 p.i. the large intestine was collected to produce adult E/S.  
374 Guts were collected and then longitudinally split open before washed in warmed 5x  
375 penicillin/streptomycin in complete RMPI 1640 medium (500U/ml penicillin, 500µg/ml  
376 streptomycin, 500ml RMPI 1640 medium). Adult worms were then carefully pulled from the  
377 gut using fine forceps and transferred to a 6 well plate containing 4ml warmed 5x pen/strep in  
378 RMPI 1640 medium. Plates were incubated in a moist humidity box for 4 hours at 37°C to  
379 collect 4 hr E/S. For overnight E/S, adult worms were then split into 2 wells containing fresh  
380 medium and incubated again in a humidity box at 37°C overnight. Supernatant from 4 hour  
381 and 24 hour incubations was collected and centrifuged at 2000g for 15 minutes. *T. muris* eggs  
382 from adult worms were resuspended in 40ml deionised water and filtered through a 100µm  
383 nylon sieve before transferring to a cell culture flask. To allow embryonation, eggs were  
384 stored in darkness for approximately 8 weeks and then stored at 4°C. SCID mice were  
385 subsequently infected with a high dose infection to determine infectivity of each new batch of  
386 eggs. Thus, larvae were counted at around d14 p.i. and the number of larvae counted  
387 expressed as a % over the number of eggs given to determine the infectivity of the egg batch.  
388 All E/S supernatant was filter sterilised through a 0.2µm syringe filter (Merk). E/S was  
389 concentrated using an Amicon Ultra-15 centrifugal filter unit (Millipore) by spinning at  
390 3000g for 15 minutes at 4°C. E/S was dialysed against PBS using Slide-A-Lyzer Dialysis  
391 Cassettes, 3.500 MWCO (Thermo Science) at 4°C. The concentration of E/S was measured  
392 using the Nanodrop 1000 spectrophotometer (Thermo Fisher Science) and aliquoted before  
393 storing at -80°C.

394 For high dose *Trichuris muris* infection, approximately 3-4 ml of egg suspension was  
395 transferred to a universal tube and topped up with deionised water before centrifuging for 15  
396 minutes at 2000g. Pelleted eggs were washed with deionised water, resuspended and only  
397 embryonated eggs were counted. Eggs were concentrated or diluted with deionised water,  
398 depending on the egg count. For example, eggs with 100% infectivity, approximately 50 eggs  
399 per 50µl were counted. Mice were then infected with 200µl by oral gavage to infect mice  
400 with approximately 200 eggs.

401

#### 402 4. Worm burden of *Trichuris muris*

403 During autopsy, the caecum and proximal colon were collected and stored at -20°C  
404 before analysis. Before worm count, the intestine was thawed at room temperature and cut  
405 longitudinally using blunt ended scissors and the epithelium was scraped using curved  
406 forceps in a petri dish. Worms were counted blindly under a dissecting microscope (Leica).

407

#### 408 5. Preparation of single cell suspensions for fluorescence activated cell sorting (FACS)

409 Mesenteric lymph nodes (MLNs), spleen, blood and bone marrow were collected and  
410 prepared for FACS staining. Lymph nodes and spleen were squeezed through a 70µm nylon  
411 cell strainer (Fisher Scientific) and cells were pelleted by centrifugation at 1500 rpm for 5  
412 minutes. The supernatant was removed and the pelleted cells were resuspended in 500µl to 1  
413 ml of Red Blood Cell Lysing Buffer Hybri-Max™ (Sigma-Aldrich) for 30 seconds to 1  
414 minute before adding 10 ml 1xPBS. Cells were pelleted by centrifugation at 1500 rpm for 5  
415 minutes and resuspended in 1 ml of complete RPMI 1640 medium. Cells were counted on a  
416 CASY cell counter (Scharfe System).

417 Approximately 50µl of blood were placed into 1.5 ml eppendorf tube containing 50µl  
418 0.5M EDTA and stored on ice before analysis. 500 µl of Red Blood Cell Lysing Buffer

419 Hybri-Max™ (Sigma-Aldrich) were added and samples were incubated for 5 minutes at room  
420 temperature. 1 ml of 1xPBS were added and cells were pelleted by centrifugation at 1500 rpm  
421 for 5 minutes. Red blood cell lysis process was repeated twice before cells were resuspended  
422 in 1 ml of complete RPMI 1640 medium.

423 Femurs and tibias were collected at autopsy and after removing any remaining tissue  
424 without damaging the bone integrity, the bone was placed on ice until ready to process. Bone  
425 was transferred to 70% ethanol for 2-3 minutes and then rinse in 3 changes of 1xPBS. In a  
426 petri dish, both ends of bone were cut and the bone was flushed gently with 1xPBS using a  
427 3cc syringe and a 23 ga needle. To break up the clumps, the marrow was sucked up and was  
428 gently pushed back. Single cells suspension was filtered through 100µm nylon cell strainer  
429 (Fisher Scientific) and cells were pelleted by centrifugation at 1500 rpm for 5 minutes and  
430 resuspended in 1 ml of 1xPBS. The supernatant was removed and the pelleted cells were  
431 resuspended in 500µl of Red Blood Cell Lysing Buffer Hybri-Max™ (Sigma-Aldrich) for 1  
432 minute before adding 10 ml 1xPBS. Cells were pelleted by centrifugation at 1500 rpm for 5  
433 minutes and resuspended in 1 ml of complete RPMI 1640 medium.

434

#### 435 6. Cell surface markers

436 Cells from MLNs, spleen, blood and bone marrow were stained for live dead (Zombie  
437 UV, Biolegend) and Fc block (eBiosciences) prior to cell surface cellular markers staining.  
438 Samples were read on a BD LSR Fortessa flow cytometer (BD Biosciences) and data was  
439 analysed using FlowJo X (Tree Star, Inc).

440 Cell surface markers: anti-B220 (RA3-6B2); anti-CD19 (6D5); anti-CD3ε (17A2);  
441 anti-CD4 (RM4.5); anti-CD8α (53-6.7); anti-CD279 (PD-1) (29F.1A12); anti-  
442 CD185/CXCR5 (L138D7); anti-CD93 (AA4.1); anti-CD25 (3C7); and anti-CD117/c-kit  
443 (2B8) were purchased from Biolegend. Anti-CD43 (S11); anti-CD103 (2E7); anti-CD11c

444 (N418); anti-CD317/PDCA-1 (927); anti CD11b (M1/70); anti-CD64 (X54-5/7.1); anti-I-A/I-  
445 E (M5/114.15.2); and anti-CD23 (B3B4) were purchased from BD Biosciences. Anti-CD45  
446 (30-F11); anti-ly6G (RB6-8C5); anti-NK.1 (PK136); anti-Ter119 (Ter-119) purchased from  
447 eBiosciences.

448

#### 449 7. Quantification of parasite specific IgG1, IgG2a/c and IgM

450 To detect IgG1, IgG2a/c and IgM specific *T. muris*, an enzyme linked immunosorbant  
451 assay (ELISA) was completed. Blood was collected from mice at autopsy and serum was  
452 isolated by centrifuging samples for 10 minutes at 15,000g at room temperature. 96 well  
453 immunoGrade plates (BrandTech Scientific, Inc) were coated with 5µg/ml *T. muris* diluted in  
454 0.05M carbonate/bicarbonate buffer and incubated on plates overnight at 4°C. Plates were  
455 washed using a Skatron Scan Washer 500 (Molecular Devices, Norway) 3 times with 0.05%  
456 Tween 20 (Sigma) in PBS (PBS-T). Non-specific binding were blocked with 100µl 3%  
457 bovine serum albumin (BSA) (Melford Laboratories)/ PBS at 37°C for 45 minutes. Plates  
458 were washed 3 times with PBS-T and 50µl of double diluted serum in PBS (1:20, 1:40, 1:80,  
459 1:160, 1:320, 1:640, 1:1280, 1:2560) was added to plates and incubated for 60 minutes. Plates  
460 were then washed 3 times with PBS-T and 50µl of either biotinylated rat anti-mouse IgG1  
461 (1:500, BD Bioscience), rat anti-mouse IgG2a (1:1000, BD Bioscience) or rat anti-mouse  
462 IgM (1:500, BD Bioscience) was added to wells and incubated for 60 minutes. C57BL/6 mice  
463 do not make IgG2a, but IgG2c. However, the rat anti-mouse IgG2a antibody also recognises  
464 mouse IgG2c, the IgG2a equivalent. Plates were then washed with PBS-T 3 times before the  
465 plates were incubated with 75µl Streptavidin peroxidase (1:1000, Sigma) for 60 minutes.  
466 Plates were washed 3 times with PBS-T before the colour were developed using 100µl 0.03%  
467 hydrogen peroxidase activated ABTS (10% 2,2'-azino 3-thyl benzthiazoline in 0.045M citrate  
468 buffer). Plates were read at 450nm on a VersaMax Microplate reader (Molecular Devices).

469 8. Cytokine analysis

470 During autopsy, mesenteric lymph nodes were isolated and collected in complete  
471 RPMI 1640 medium. The tissue were squeezed through a 70µm nylon cell strainer (Fisher  
472 Scientific) and cells were pelleted by centrifugation at 1500 rpm for 5 minutes. The  
473 supernatant was removed and the pelleted cells were resuspended in 500µl to 1 ml of Red  
474 Blood Cell Lysing Buffer Hybri-Max™ (Sigma-Aldrich) for 30 seconds to 1 minute before  
475 adding 10 ml 1xPBS. Cells were pelleted by centrifugation at 1500 rpm for 5 minutes and  
476 resuspended in 1 ml of complete RPMI 1640 medium. Cells were counted on a CASY cell  
477 counter (Scharfe System) and then diluted to a concentration of  $1 \times 10^7$  cells/ml. 100µl of cells  
478 were plated out into a 96 well flat bottom plate. Cells were restimulated with 100µl 4 hr *T.*  
479 *muris* E/S at 100µg/ml (to give a final concentration of E/S in the cell culture of 50µg/ml).  
480 Cells were incubated for 48 hours at 37°C and 5% CO<sub>2</sub>. To collect the supernatant, plates  
481 were centrifuged at 1400g for 5 minutes and the supernatant was stored at -20°C.

482 The cytokines IL-4, IL-5, IL-6, IL-9, IL-10, IL-17, IL-13, TNF and IFN-γ were  
483 detected in supernatant by Cytometric bead assay (CBA). 12.5µl of supernatant from *T. muris*  
484 E/S stimulated cells was added to a 96-well round bottom plate. A capture bead cocktail (BD  
485 Bioscience), containing beads for each cytokine, was diluted in capture diluent (BD  
486 Bioscience) and 12.5µl was added to each well before incubating on a rocker at room  
487 temperature for 1 hour. 12.5µl of detection beads (BD Bioscience), diluted in detection  
488 reagent (BD Bioscience) was added to each well and incubated again on a rocker at room  
489 temperature for 1 hour. Plates were washed and resuspended in 70µl wash buffer (BD  
490 Bioscience). Cytokines were measured on a MACSQuant Analyser (Miltenyi Biotec) and  
491 analysed using the FCAP array software in reference to a standard curve.

492

493

494 9. Statistical analysis

495 Statistical analysis was performed using Prism4 (Graph-Pad software Inc., La Jolla,  
496 CA). The significant differences between two groups ( $P < 0.05$ ) were analysed with the t-test  
497 or Mann Whitney test, depend on the n-size and the distribution of samples. For multiple  
498 groups, the significant differences were analysed by Anova.

499

500 10. Ethics statement

501 All experiments were approved by The University of Manchester Local Ethical  
502 Review Committee and were performed in accordance with the UK Home Office Animals  
503 (Scientific Procedures) Act 1986, under the home Office project licence number 70/8127

504

505 **Acknowledgment**

506 This study was funded by the Indonesian endowment fund for education. We would like to  
507 thank Rebecca Dookie for helping us with i.v. injection, Genentech (San Francisco, CA) for  
508 their gift of purified anti-CD20 mAb (clone-5D2), and Gareth Howell from Flow cytometry  
509 facility at the University of Manchester.

510

511 **Conflict of interests**

512 The authors declare no commercial or financial conflict of interest

513

514

515

516

517 **Figure legend**

518

519 **Fig. 1. Two injections of anti CD20-mab are required to ensure B cells are depleted**  
520 **occurred throughout infection.** C57BL/6 mice were treated with anti CD20 mAb or Rat  
521 IgG2a isotype control at 100 µg in 200 µl PBS by i.v. injection via tail vein. Mice were  
522 infected with approximately 150 *T. muris* eggs at day 7 post injection. Some mice were only  
523 injected once with anti CD20/ rat IgG2a isotype control, whilst some mice were re-injected  
524 i.v. with anti CD20 mAb or Rat IgG2a at 100 µg in 200 µl PBS on day 10 p.i. Mice were  
525 autopsied at day 35 p.i. (A&B) CD19+ cells were assessed in MLNs, spleen, blood,  
526 peritoneal cavity (PerC), and bone marrow (BM) using flow cytometry. (C) Representative  
527 flow cytometric analysis of CD19+ cells in BM of anti-CD20 treated mice. Both immature  
528 and mature B cells are IgM+, whilst pro/pre-B cells are IgM-. Pro-B cells are defined as  
529 CD19+B220<sup>low</sup>IgM-CD93+CD43+CD25-ckit+. Data shown is mean ± SEM, representative  
530 of 2 independent experiments for Rat IgG2a and α-CD20 2x, from 1 experiment for α-CD20  
531 1x, n=5, males. \*p<0.05, \*\*p<0.01, \*\*\*p<0.001, \*\*\*\*p<0.0001, Anova.

532

533 **Fig. 2. B cell depleted C57BL6 mice were susceptible to *T. muris*, correlating with an**  
534 **absence of class switched antibodies and a significant decrease in Th2 cytokines.**  
535 C57BL/6 mice were treated with anti CD20 mAb or Rat IgG2a isotype control at 100 µg in  
536 200 µl PBS by i.v. injection via tail vein prior to infection. Mice were infected with  
537 approximately 150 *T. muris* eggs. Mice were autopsied at day 35 p.i.. (A) Diagram of  
538 experimental design. (B) Worm burdens were assessed blindly after autopsy. (C-E) Sera were  
539 analysed using ELISA for parasite specific antibodies. (F-J) MLN cells were re-stimulated  
540 with parasite E/S antigen for 48 hours and cytokines in supernatants were determined using  
541 cytokine bead array (CBA). Data shows mean ± SEM, pooled from 3 independent



542 experiments (B&F-K), representative of 3 independent experiments (C-E), males, \* $p < 0.05$ ,  
543 \*\* $p < 0.01$  \*\*\* $p < 0.001$ , Student's t-test.

544

545 **Fig. 3. B cell depletion alters the  $T_{FH}$  population and DC subsets in MLNs.** C57BL/6 mice  
546 were treated with anti CD20 mAb or Rat IgG2a isotype control at 100  $\mu\text{g}$  in 200  $\mu\text{l}$  PBS by  
547 i.v. injection via the tail vein. Mice were infected with approximately 150 *T. muris* eggs at  
548 day 7 post injection. Mice were re-injected with anti CD20 mAb or isotype control at 100  $\mu\text{g}$   
549 in 200  $\mu\text{l}$  PBS by i.v. injection via the tail vein at day 10 p.i.. Mice were autopsied on day 0,  
550 day 10 and day 35 p.i. for  $T_{FH}$  and on day 35 p.i. for DC subsets. (A) Gating on  
551 CD4+CXCR5+PD-1<sup>high</sup> to define  $T_{FH}$  cells in MLNs. (B&C) Relative % and total cell  
552 number of  $T_{FH}$  in MLNs, respectively. (D-H) DC subsets in MLNs. (E&F) Relative  
553 percentage and total cell number of CD103-CD11b+ DCs, respectively. (G&H) Relative  
554 percentage and total cell number of CD103+CD11b+ DCs, respectively. Data shows mean  $\pm$   
555 SEM, from 1 experiment,  $n=3-5$ , males, \* $p < 0.05$ , \*\* $p < 0.01$ , Mann Whitney test.

556

557 **Fig. 4. B cell depletion from day 14 p.i. also leads to susceptibility to *T. muris* infection.**  
558 C57BL/6 were treated with anti CD20 mAb or Rat IgG2a isotype control at 100  $\mu\text{g}$  in 200  $\mu\text{l}$   
559 PBS by i.v. injection via the tail vein 2 weeks post infection (p.i.). Mice were re-injected with  
560 anti CD20 mAb or isotype control at 100  $\mu\text{g}$  in 200  $\mu\text{l}$  PBS by i.v. injection via the tail vein  
561 on day 24 p.i. Mice were autopsied on day 35 p.i. (A) Diagram of the experiment design for  
562 B cells depletion 2 weeks post-infection. (B) Worm burdens were assessed blindly after  
563 autopsy. (C) Gating on CD4+CXCR5+PD-1<sup>high</sup> to define  $T_{FH}$  cells in MLNs. (D&E) Relative  
564 % and total cell number of  $T_{FH}$  in MLNs, respectively. (F-K) MLN cells were re-stimulated  
565 with parasite E/S antigen for 48 hours and cytokines in supernatants were determined using

566 cytokine bead array (CBA). Data show mean  $\pm$  SEM from 1 experiment, n=5, males,  
567 \*p<0.05, \*\*p<0.01, Mann Whitney test.

568

569 **Fig. 5. Anti-IFN- $\gamma$  treatment restored resistance to *T. muris* infection and partially**  
570 **rescued the IL-13 response in B cell depleted mice in the absence of *T. muris* specific**  
571 **IgG1 antibodies and without preserving T<sub>FH</sub> population.** C57BL/6 mice were treated with  
572 anti CD20 mAb or isotype control at 100  $\mu$ g in 200  $\mu$ l PBS by i.v. injection via the tail vein.  
573 Mice were infected with approximately 150 *T. muris* eggs at day 7 post injection. Mice were  
574 re-injected with anti CD20 mAb or isotype control at 100  $\mu$ g in 200  $\mu$ l PBS i.v. injection via  
575 tail vein on day 10 p.i.. 1 mg of  $\alpha$ -IFN- $\gamma$  antibody or Rat Ig (as a control) was given on day 0,  
576 day 7, and day 14 p.i.. Mice were autopsied on day 21 p.i. and day 35 p.i.. (A) Diagram of the  
577 experimental design. (B) Worm burdens were assessed blindly after autopsy at day 35 p.i..  
578 (C&D) *T. muris* specific IgG1 and IgG2c antibodies in the sera by day 21 p.i., respectively.  
579 (E-H) Cytokine analysis of re-stimulated MLN cells day 21 p.i.. (I) Gating on  
580 CD4+CXCR5+PD-1<sup>high</sup> to define T<sub>FH</sub> cells in MLNs day 21 p.i.. (J) Total numbers of T<sub>FH</sub>  
581 cells in MLNs day 21 p.i.. Data shows mean  $\pm$  SEM, from 1 experiment, n=5, males,  
582 \*p<0.05, \*\*p<0.01, \*\*\*p<0.001, \*\*\*\*p<0.0001, Anova.

583

584 **Fig. 6. BALB/c mice were able to expel *T. muris* in the absence of B cells.** BALB/c mice  
585 were treated with anti CD20 mAb or Rat IgG2a isotype control at 100  $\mu$ g in 200  $\mu$ l PBS by  
586 i.v. injection via tail vein prior to infection. Mice were infected with approximately 150 *T.*  
587 *muris* eggs and were autopsied at day 42 p.i.. (A) Diagram of experimental design. (B)  
588 CD19<sup>+</sup> cells were assessed in MLNs, spleen, and peritoneal cavity (PerC) using flow  
589 cytometry. (C) Worm burdens were assessed blindly after autopsy. (D-F) Sera were analysed

590 using ELISA for parasite specific antibodies. Data shows mean  $\pm$  SEM, from 1 experiment,

591 n=5, males. \*p<0.05, \*\*\*p<0.001 \*\*\*\*p<0.0001, Student's t-test.

592

593

- 594 1. Hotez PJ, Brindley PJ, Bethony JM, King CH, Pearce EJ, Jacobson J. Helminth infections: the  
595 great neglected tropical diseases. *The Journal of clinical investigation*. 2008;118(118 (4)):1311-21.
- 596 2. Zhan B, Beaumier CM, Briggs N, Jones KM, Keegan BP, Bottazzi ME, et al. Advancing a  
597 multivalent Pan-anthelmintic vaccine against soil-transmitted nematode infections. *Expert review of*  
598 *vaccines*. 2014;13(3):321-31.
- 599 3. Bethony J, Brooker S, Albonico M, Geiger SM, Loukas A, Diemert D, et al. Soil-transmitted  
600 helminth infections: ascariasis, trichuriasis, and hookworm. *The Lancet*. 2006;367(9521):1521-32.
- 601 4. Constant S, Schweitzer N, West J, Ranney P, Bottomly K. B lymphocytes can be competent  
602 antigen-presenting cells for priming CD4+ T cells to protein antigens in vivo. *The Journal of*  
603 *Immunology*. 1995;155(8):3734-41.
- 604 5. Liu Y, Wu Y, Ramarathinam L, Guo Y, Huszar D, Trounstein M, et al. Gene-targeted B-  
605 deficient mice reveal a critical role for B cells in the CD4 T cell response. *International immunology*.  
606 1995;7(8):1353-62.
- 607 6. Magee CN, Boenisch O, Najafian N. The role of costimulatory molecules in directing the  
608 functional differentiation of alloreactive T helper cells. *American Journal of Transplantation*.  
609 2012;12(10):2588-600.
- 610 7. Lund FE, Garvy BA, Randall TD, Harris DP. Regulatory roles for cytokine-producing B cells in  
611 infection and autoimmune disease. 2005.
- 612 8. Williams M, Chang T, Burke S, Lichtman A, Abbas A. Activation of functionally distinct  
613 subsets of CD4+ T lymphocytes. *Research in immunology*. 1991;142(1):23-8.
- 614 9. Harris DP, Goodrich S, Gerth AJ, Peng SL, Lund FE. Regulation of IFN- $\gamma$  production by B  
615 effector 1 cells: essential roles for T-bet and the IFN- $\gamma$  receptor. *The Journal of Immunology*.  
616 2005;174(11):6781-90.
- 617 10. Wojciechowski W, Harris DP, Sprague F, Mousseau B, Makris M, Kusser K, et al. Cytokine-  
618 producing effector B cells regulate type 2 immunity to *H. polygyrus*. *Immunity*. 2009;30(3):421-33.
- 619 11. Harris DP, Goodrich S, Mohrs K, Mohrs M, Lund FE. Cutting edge: the development of IL-4-  
620 producing B cells (B effector 2 cells) is controlled by IL-4, IL-4 receptor  $\alpha$ , and Th2 cells. *The Journal*  
621 *of Immunology*. 2005;175(11):7103-7.
- 622 12. Hurdal R, Ndlovu HH, Revaz-Breton M, Parihar SP, Nono JK, Govender M, et al. IL-4-  
623 producing B cells regulate T helper cell dichotomy in type 1-and type 2-controlled diseases.  
624 *Proceedings of the National Academy of Sciences*. 2017;114(40):E8430-E9.
- 625 13. Linton P-J, Bautista B, Biederman E, Bradley ES, Harbertson J, Kondrack RM, et al.  
626 Costimulation via OX40L expressed by B cells is sufficient to determine the extent of primary CD4 cell  
627 expansion and Th2 cytokine secretion in vivo. *Journal of Experimental Medicine*. 2003;197(7):875-  
628 83.
- 629 14. Liu Q, Liu Z, Rozo CT, Hamed HA, Alem F, Urban JF, et al. The role of B cells in the  
630 development of CD4 effector T cells during a polarized Th2 immune response. *The Journal of*  
631 *Immunology*. 2007;179(6):3821-30.
- 632 15. León B, Ballesteros-Tato A, Browning JL, Dunn R, Randall TD, Lund FE. Regulation of TH2  
633 development by CXCR5+ dendritic cells and lymphotoxin-expressing B cells. *Nature immunology*.  
634 2012;13(7):681-90.
- 635 16. Yoichi I. The absence of resistance in congenitally athymic nude mice toward infection with  
636 the intestinal nematode, *Trichuris muris*: resistance restored by lymphoid cell transfer. *International*  
637 *journal for parasitology*. 1991;21(1):65-9.
- 638 17. KOYAMA K, TAMAUCHI H, ITO Y. The role of CD4+ and CD8+ T cells in protective immunity to  
639 the murine nematode parasite *Trichuris muris*. *Parasite immunology*. 1995;17(3):161-5.
- 640 18. Else KJ, Grecis RK. Antibody-independent effector mechanisms in resistance to the  
641 intestinal nematode parasite *Trichuris muris*. *Infection and immunity*. 1996;64(8):2950-4.
- 642 19. Betts C, Else K. *Trichuris muris*: CD4+ T cell-mediated protection in reconstituted SCID mice.  
643 *Parasitology*. 2000;121(6):631-7.

- 644 20. Little MC, Bell LV, Cliffe LJ, Else KJ. The characterization of intraepithelial lymphocytes,  
645 lamina propria leukocytes, and isolated lymphoid follicles in the large intestine of mice infected with  
646 the intestinal nematode parasite *Trichuris muris*. *The Journal of Immunology*. 2005;175(10):6713-22.
- 647 21. Svensson M, Russell K, Mack M, Else KJ. CD4+ T-cell localization to the large intestinal  
648 mucosa during *Trichuris muris* infection is mediated by G $\alpha$ i-coupled receptors but is CCR6-and  
649 CXCR3-independent. *Immunology*. 2010;129(2):257-67.
- 650 22. Blackwell NM, Else KJ. B cells and antibodies are required for resistance to the parasitic  
651 gastrointestinal nematode *Trichuris muris*. *Infection and immunity*. 2001;69(6):3860-8.
- 652 23. Fu Y-X, Chaplin DD. Development and maturation of secondary lymphoid tissues. *Annual*  
653 *review of immunology*. 1999;17(1):399-433.
- 654 24. Golovkina TV, Shlomchik M, Hannum L, Chervonsky A. Organogenic role of B lymphocytes in  
655 mucosal immunity. *Science*. 1999;286(5446):1965-8.
- 656 25. Cheson BD, Leonard JP. Monoclonal antibody therapy for B-cell non-Hodgkin's lymphoma.  
657 *New England Journal of Medicine*. 2008;359(6):613-26.
- 658 26. Shahaf G, Zisman-Rozen S, Benhamou D, Melamed D, Mehr R. B Cell Development in the  
659 Bone Marrow Is Regulated by Homeostatic Feedback Exerted by Mature B Cells. *Frontiers in*  
660 *immunology*. 2016;7:77.
- 661 27. Uchida J, Lee Y, Hasegawa M, Liang Y, Bradney A, Oliver JA, et al. Mouse CD20 expression  
662 and function. *International immunology*. 2004;16(1):119-29.
- 663 28. Uchida J, Hamaguchi Y, Oliver JA, Ravetch JV, Poe JC, Haas KM, et al. The innate  
664 mononuclear phagocyte network depletes B lymphocytes through Fc receptor-dependent  
665 mechanisms during anti-CD20 antibody immunotherapy. *Journal of Experimental Medicine*.  
666 2004;199(12):1659-69.
- 667 29. Chan AC, Carter PJ. Therapeutic antibodies for autoimmunity and inflammation. *Nature*  
668 *Reviews Immunology*. 2010;10(5):301.
- 669 30. Misumi I, Whitmire JK. B cell depletion curtails CD4+ T cell memory and reduces protection  
670 against disseminating virus infection. *The Journal of Immunology*. 2014;192(4):1597-608.
- 671 31. Little MC, Hurst RJ, Else KJ. Dynamic changes in macrophage activation and proliferation  
672 during the development and resolution of intestinal inflammation. *The Journal of Immunology*.  
673 2014:1400502.
- 674 32. Bancroft AJ, McKenzie AN, Grencis RK. A critical role for IL-13 in resistance to intestinal  
675 nematode infection. *The Journal of Immunology*. 1998;160(7):3453-61.
- 676 33. Zaretsky AG, Taylor JJ, King IL, Marshall FA, Mohrs M, Pearce EJ. T follicular helper cells  
677 differentiate from Th2 cells in response to helminth antigens. *The Journal of experimental medicine*.  
678 2009;206(5):991-9.
- 679 34. Else K, Grencis R. Cellular immune responses to the murine nematode parasite *Trichuris*  
680 *muris*. I. Differential cytokine production during acute or chronic infection. *Immunology*.  
681 1991;72(4):508.
- 682 35. Bancroft AJ, Else KJ, Sypek JP, Grencis RK. Interleukin-12 promotes a chronic intestinal  
683 nematode infection. *European journal of immunology*. 1997;27(4):866-70.
- 684 36. Xu X, Shi Y, Cai Y, Zhang Q, Yang F, Chen H, et al. Inhibition of increased circulating Tfh cell by  
685 anti-CD20 monoclonal antibody in patients with type 1 diabetes. *PLoS One*. 2013;8(11):e79858.
- 686 37. Demiri M, Müller-Luda K, Agace WW, Svensson-Frej M. Distinct DC subsets regulate adaptive  
687 Th1 and 2 responses during *Trichuris muris* infection. *Parasite immunology*. 2017;39(10):e12458.
- 688 38. Cruickshank SM, Deschoolmeester ML, Svensson M, Howell G, Bazakou A, Logunova L, et al.  
689 Rapid dendritic cell mobilization to the large intestinal epithelium is associated with resistance to  
690 *Trichuris muris* infection. *The Journal of Immunology*. 2009;182(5):3055-62.
- 691 39. Else K, Finkelman F, Maliszewski C, Grencis R. Cytokine-mediated regulation of chronic  
692 intestinal helminth infection. *The Journal of experimental medicine*. 1994;179(1):347-51.
- 693 40. King IL, Mohrs M. IL-4-producing CD4+ T cells in reactive lymph nodes during helminth  
694 infection are T follicular helper cells. *Journal of Experimental Medicine*. 2009;206(5):1001-7.

- 695 41. Sahoo A, Alekseev A, Tanaka K, Obertas L, Lerman B, Haymaker C, et al. Batf is important for  
696 IL-4 expression in T follicular helper cells. *Nature communications*. 2015;6:7997.
- 697 42. Else K, Wakelin D. The effects of H-2 and non-H-2 genes on the expulsion of the nematode  
698 *Trichuris muris* from inbred and congenic mice. *Parasitology*. 1988;96(03):543-50.
- 699 43. Else K, Entwistle G, Grecis R. Correlations between worm burden and markers of Th1 and  
700 Th2 cell subset induction in an inbred strain of mouse infected with *Trichuris muris*. *Parasite*  
701 *immunology*. 1993;15(10):595-600.
- 702 44. Tedder T, Klejman G, Distèche C, Adler D, Schlossman S, Saito H. Cloning of a complementary  
703 DNA encoding a new mouse B lymphocyte differentiation antigen, homologous to the human B1  
704 (CD20) antigen, and localization of the gene to chromosome 19. *The Journal of Immunology*.  
705 1988;141(12):4388-94.
- 706 45. Tedder TF, Forsgren A, Boyd AW, Nadler LM, Schlossman SF. Antibodies reactive with the B1  
707 molecule inhibit cell cycle progression but not activation of human B lymphocytes. *European journal*  
708 *of immunology*. 1986;16(8):881-7.
- 709 46. Ait-Oufella H, Herbin O, Bouaziz J-D, Binder CJ, Uyttenhove C, Laurans L, et al. B cell  
710 depletion reduces the development of atherosclerosis in mice. *Journal of Experimental Medicine*.  
711 2010;207(8):1579-87.
- 712 47. Wang C, Hillsamer P, Kim CH. Phenotype, effector function, and tissue localization of PD-1-  
713 expressing human follicular helper T cell subsets. *BMC immunology*. 2011;12(1):53.
- 714 48. Crawford A, MacLeod M, Schumacher T, Corlett L, Gray D. Primary T cell expansion and  
715 differentiation in vivo requires antigen presentation by B cells. *The Journal of Immunology*.  
716 2006;176(6):3498-506.
- 717 49. Hernandez HJ, Wang Y, Stadecker MJ. In infection with *Schistosoma mansoni*, B cells are  
718 required for T helper type 2 cell responses but not for granuloma formation. *The Journal of*  
719 *Immunology*. 1997;158(10):4832-7.
- 720 50. Moulin V, Andris F, Thielemans K, Maliszewski C, Urbain J, Moser M. B lymphocytes regulate  
721 dendritic cell (DC) function in vivo: increased interleukin 12 production by DCs from B cell-deficient  
722 mice results in T helper cell type 1 deviation. *Journal of Experimental Medicine*. 2000;192(4):475-82.
- 723 51. Elsegeiny W, Eddens T, Chen K, Kolls JK. Anti-CD20 antibody therapy and susceptibility to  
724 *Pneumocystis pneumonia*. *Infection and immunity*. 2015;83(5):2043-52.
- 725 52. Choi YS, Kageyama R, Eto D, Escobar TC, Johnston RJ, Monticelli L, et al. ICOS receptor  
726 instructs T follicular helper cell versus effector cell differentiation via induction of the transcriptional  
727 repressor Bcl6. *Immunity*. 2011;34(6):932-46.
- 728 53. Johansson-Lindbom B, Borrebaeck CA. Germinal center B cells constitute a predominant  
729 physiological source of IL-4: implication for Th2 development in vivo. *The Journal of Immunology*.  
730 2002;168(7):3165-72.
- 731 54. Appleton J, McGregor D. Characterization of the immune mediator of rapid expulsion of  
732 *Trichinella spiralis* in suckling rats. *Immunology*. 1987;62(3):477.
- 733 55. Harris N, Pleass R, Behnke J. Understanding the role of antibodies in murine infections with  
734 *Heligmosomoides (polygyrus) bakeri*: 35 years ago, now and 35 years ahead. *Parasite immunology*.  
735 2014;36(3):115-24.
- 736 56. Pleass RJ, Behnke JM. B-cells get the T-cells but antibodies get the worms. *Trends in*  
737 *parasitology*. 2009;25(10):443-6.
- 738 57. McCoy KD, Stoel M, Stettler R, Merky P, Fink K, Senn BM, et al. Polyclonal and specific  
739 antibodies mediate protective immunity against enteric helminth infection. *Cell host & microbe*.  
740 2008;4(4):362-73.
- 741 58. Lund FE. Cytokine-producing B lymphocytes—key regulators of immunity. *Current opinion in*  
742 *immunology*. 2008;20(3):332-8.
- 743 59. Lu P, Urban JF, Zhou X, Chen S, Madden K, Moorman M, et al. CD40-mediated stimulation  
744 contributes to lymphocyte proliferation, antibody production, eosinophilia, and mastocytosis during



- 745 an in vivo type 2 response, but is not required for T cell IL-4 production. *The Journal of Immunology*.  
746 1996;156(9):3327-33.
- 747 60. Liu Q, Kreider T, Bowdridge S, Liu Z, Song Y, Gaydo AG, et al. B cells have distinct roles in host  
748 protection against different nematode parasites. *The Journal of Immunology*. 2010;184(9):5213-23.
- 749 61. Ligas JA, Kerepesi LA, Galioto AM, Lustigman S, Nolan TJ, Schad GA, et al. Specificity and  
750 mechanism of immunoglobulin M (IgM)-and IgG-dependent protective immunity to larval  
751 *Strongyloides stercoralis* in mice. *Infection and immunity*. 2003;71(12):6835-43.
- 752 62. BETTS CJ, ELSE KJ. Mast cells, eosinophils and antibody-mediated cellular cytotoxicity are not  
753 critical in resistance to *Trichuris muris*. *Parasite immunology*. 1999;21(1):45-52.
- 754 63. Rajan B, Ramalingam T, Rajan TV. Critical Role for IgM in Host Protection in Experimental  
755 Filarial Infection. *The Journal of Immunology*. 2005;175(3):1827-33.
- 756 64. Inaba T, Sato H, Kamiya H. Monoclonal IgA antibody-mediated expulsion of *Trichinella* from  
757 the intestine of mice. *Parasitology*. 2003;126(6):591-8.
- 758 65. Harris N, Gause WC. To B or not to B: B cells and the Th2-type immune response to  
759 helminths. *Trends in immunology*. 2011;32(2):80-8.
- 760 66. Harris N, Gause WC. To B or not to B: B cells and the Th2-type immune response to  
761 helminths. *Trends Immunol*. 2011;32(2):80-8.
- 762 67. Bradford BM, Donaldson DS, Forman R, Else KJ, Mabbott NA. Increased susceptibility to oral  
763 *Trichuris muris* infection in the specific absence of CXCR 5+ CD 11c+ cells. *Parasite Immunology*.  
764 2018:e12566.
- 765 68. Tew JG, Wu J, Fagher M, Szakal AK, Qin D. Follicular dendritic cells: beyond the necessity of  
766 T-cell help. *Trends in immunology*. 2001;22(7):361-7.
- 767 69. Katakai T, Suto H, Sugai M, Gonda H, Togawa A, Suematsu S, et al. Organizer-like reticular  
768 stromal cell layer common to adult secondary lymphoid organs. *The Journal of Immunology*.  
769 2008;181(9):6189-200.
- 770 70. Mayer JU, Demiri M, Agace WW, MacDonald AS, Svensson-Frej M, Milling SW. Different  
771 populations of CD11b+ dendritic cells drive Th2 responses in the small intestine and colon. *Nature*  
772 *communications*. 2017;8:15820.
- 773 71. Ziętara N, Łyszkiewicz M, Puchałka J, Pei G, Gutierrez MG, Lienenklaus S, et al.  
774 Immunoglobulins drive terminal maturation of splenic dendritic cells. *Proceedings of the National*  
775 *Academy of Sciences*. 2013;110(6):2282-7.
- 776 72. Sahputra R, Yam-Puc JC, Waisman A, Muller W, Else KJ. Evaluating the IgMi mouse as a novel  
777 tool to study B cell biology. *European journal of immunology*. 2018.
- 778 73. Wakelin D. Acquired immunity to *Trichuris muris* in the albino laboratory mouse.  
779 *Parasitology*. 1967;57(3):515-24.

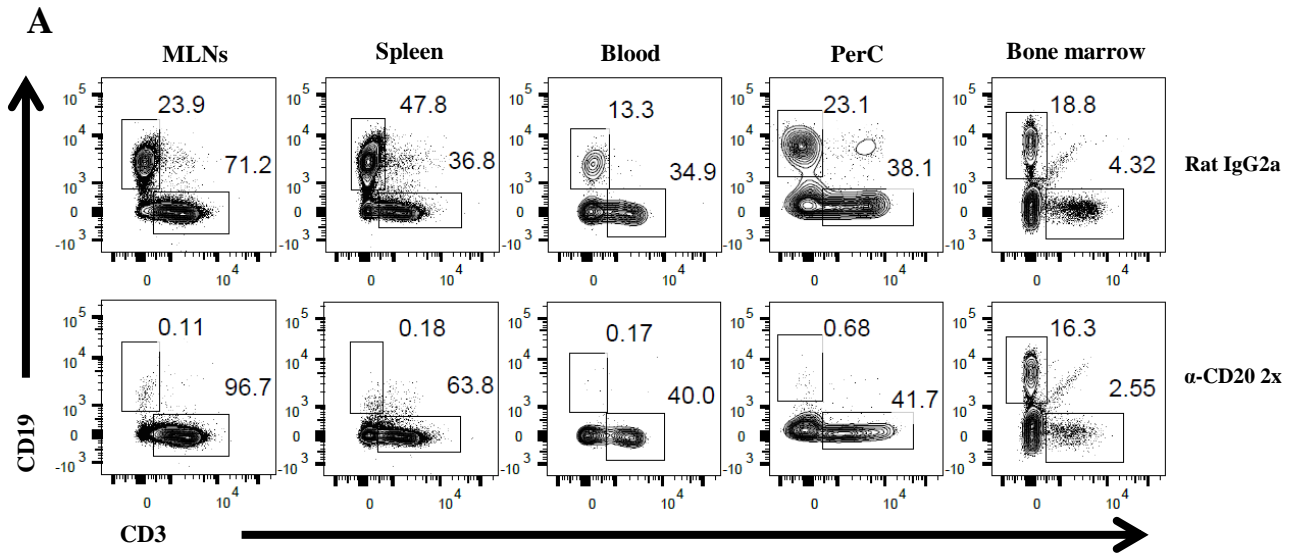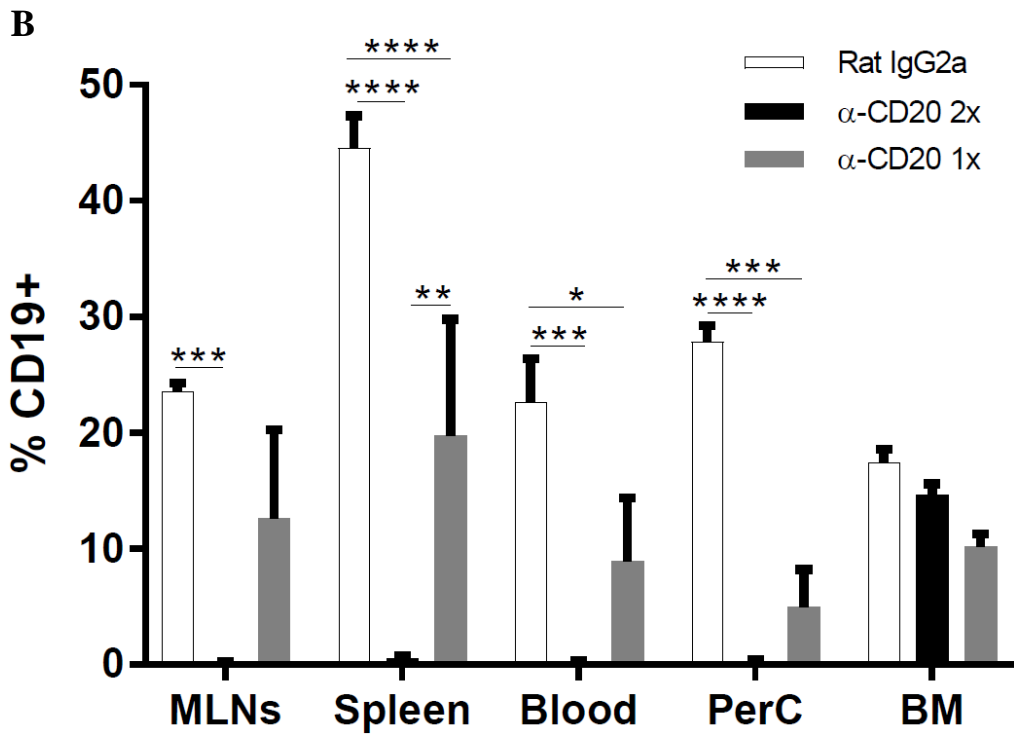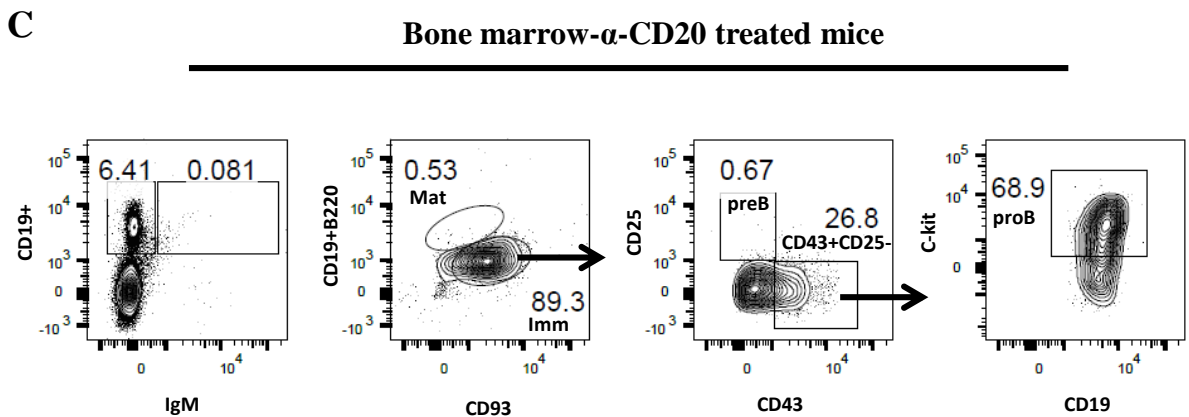



**A**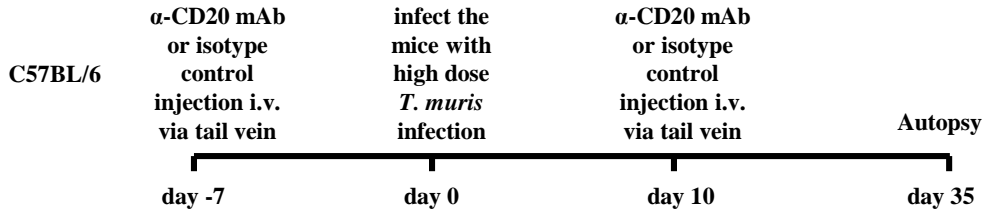**B**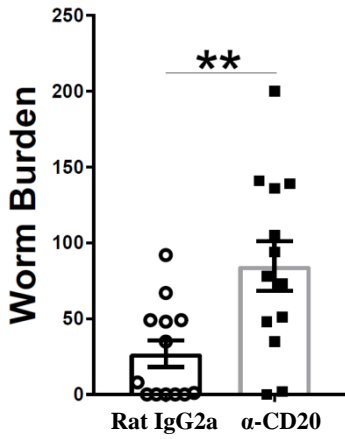**C**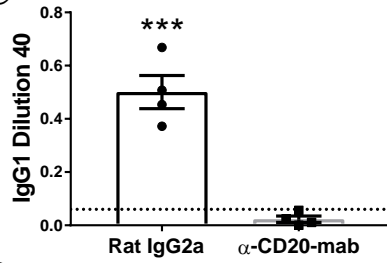**E**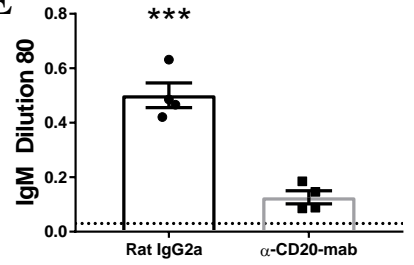**D**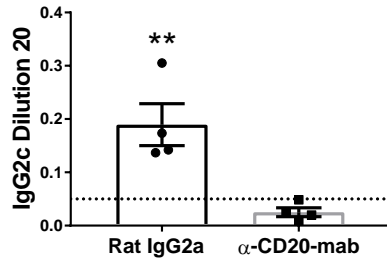**F**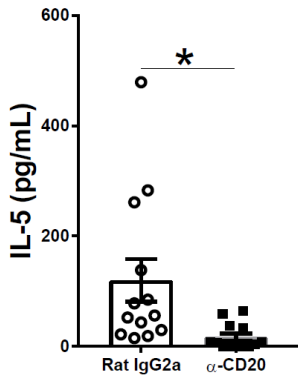**G**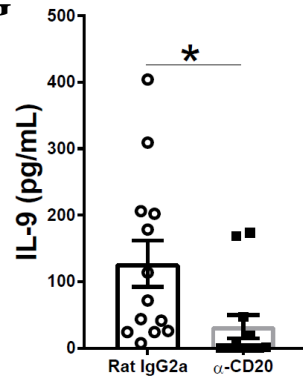**H**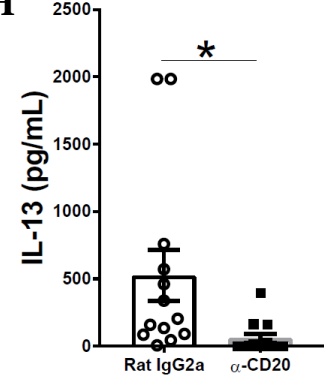**I**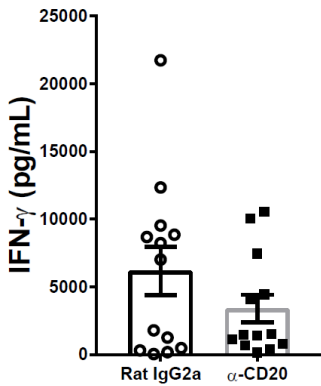**J**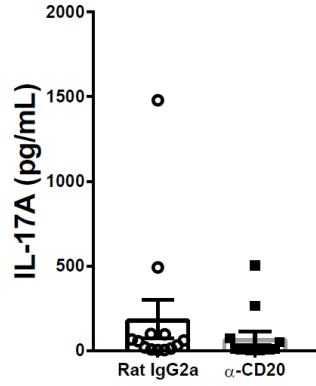

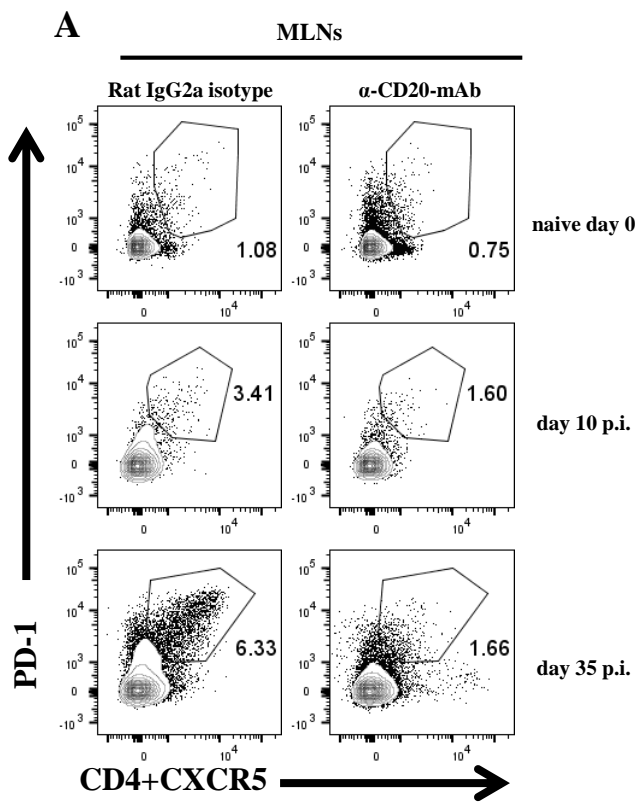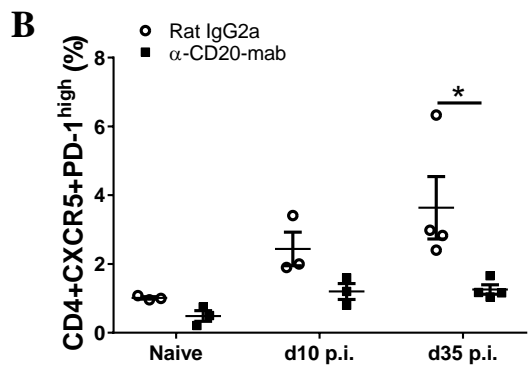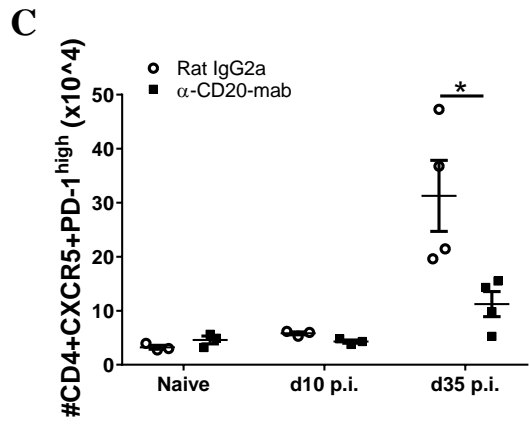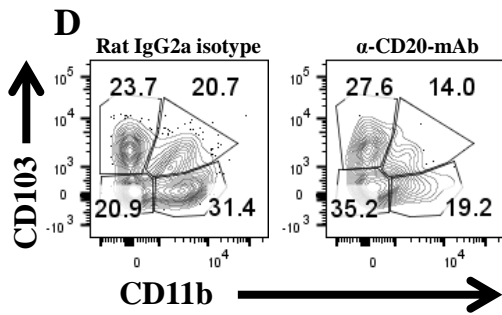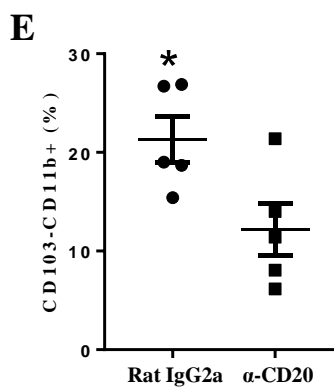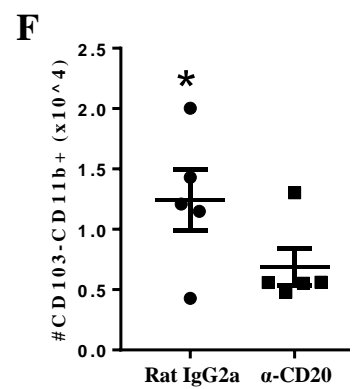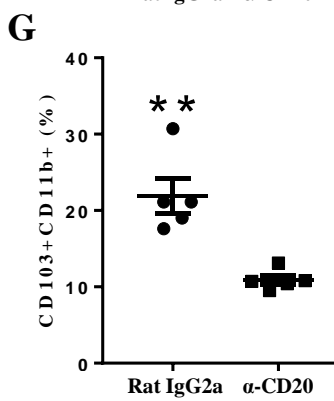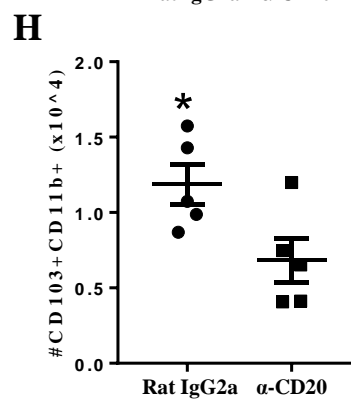

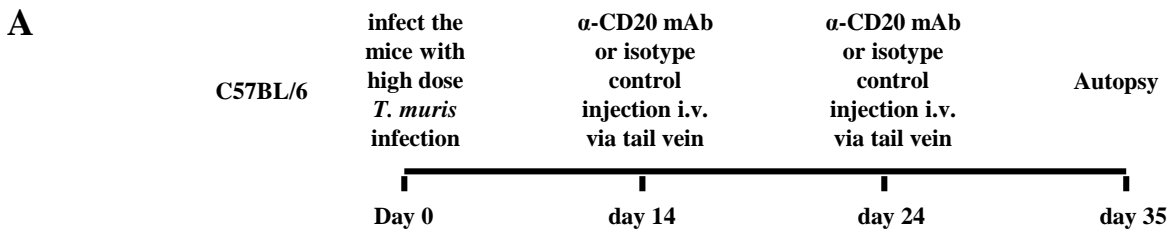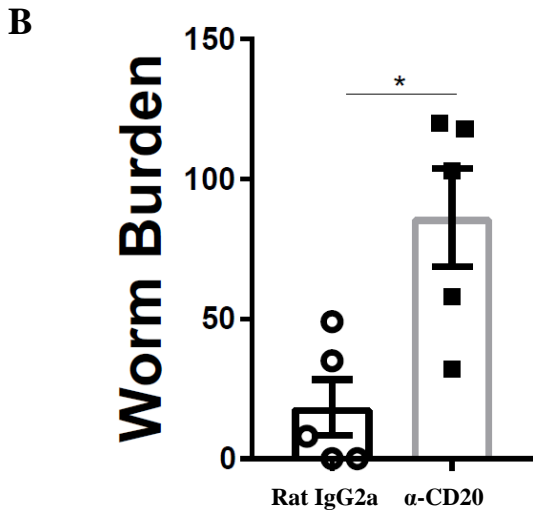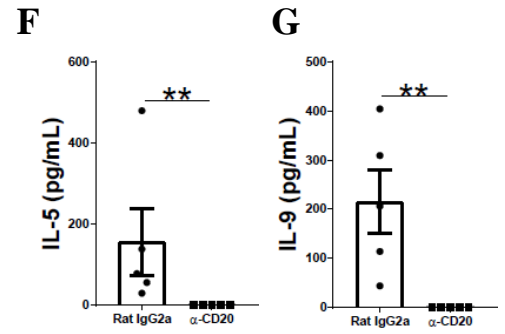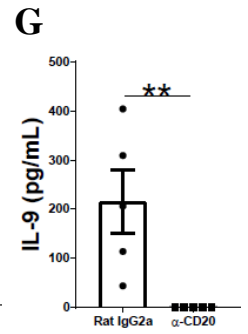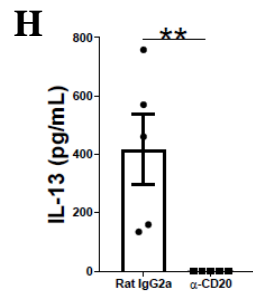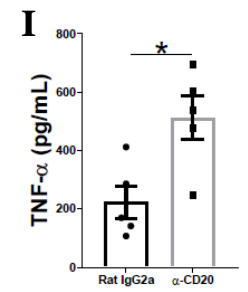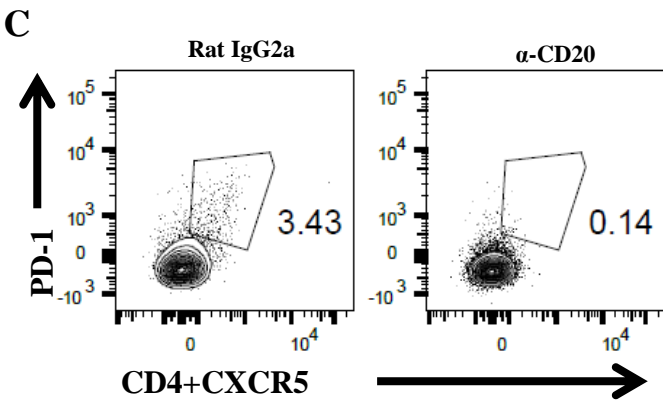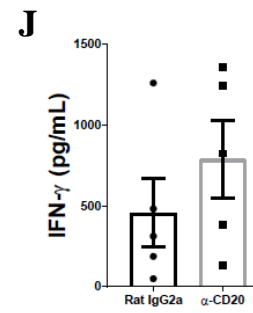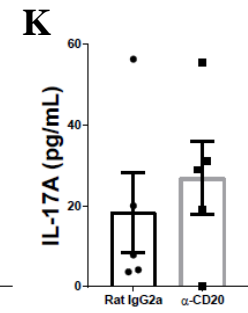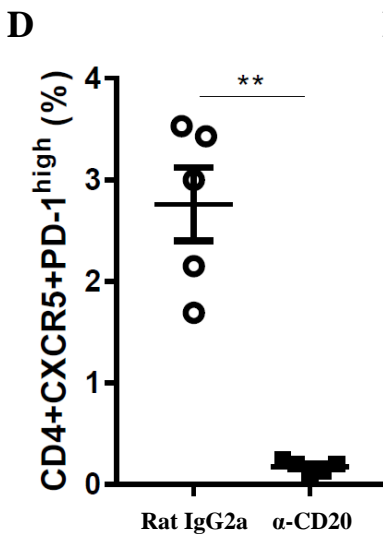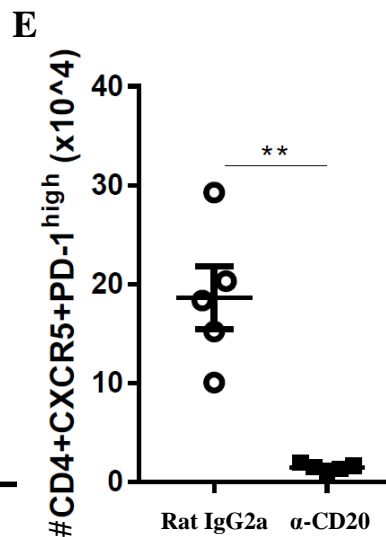

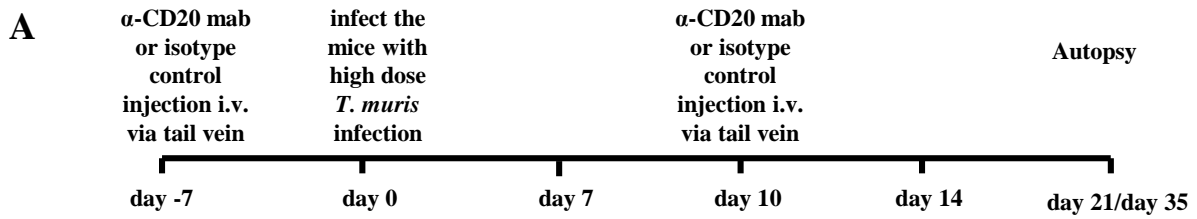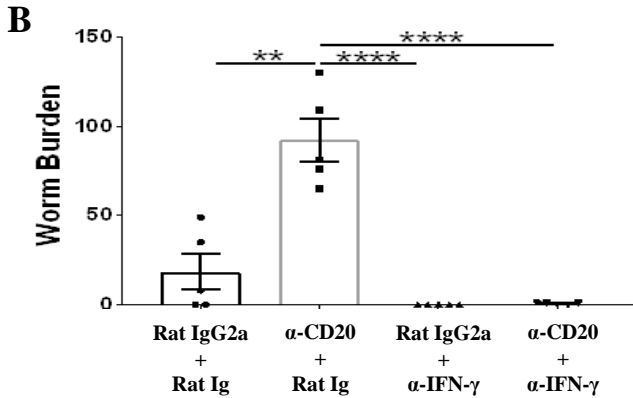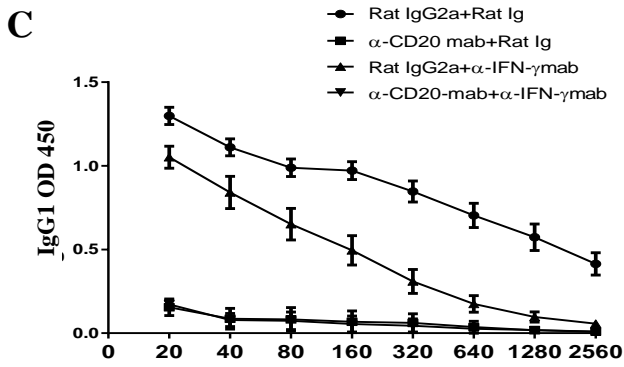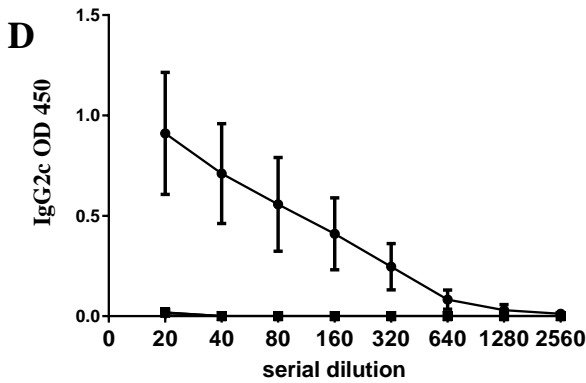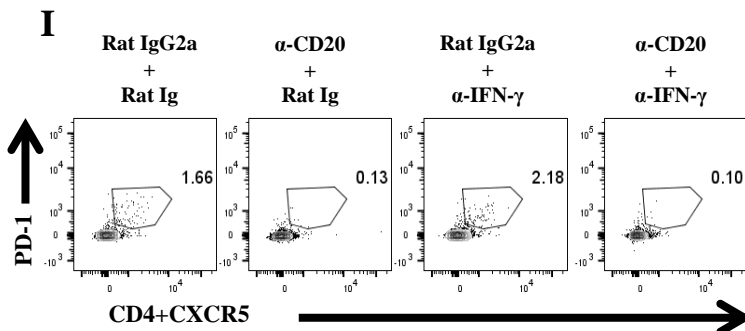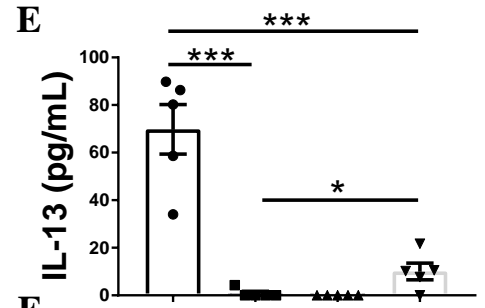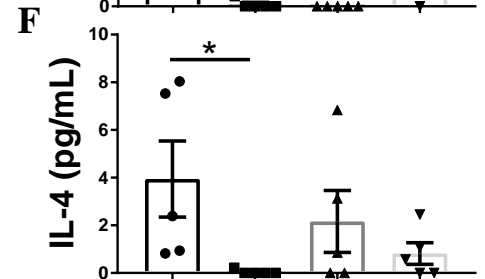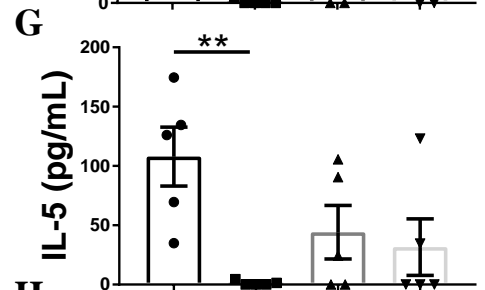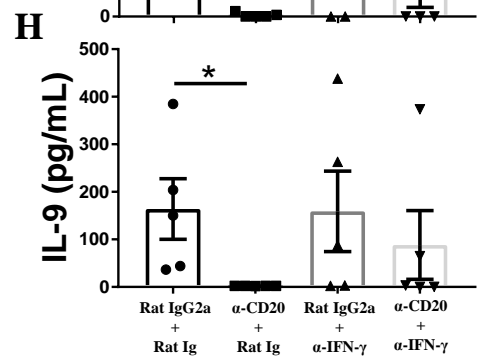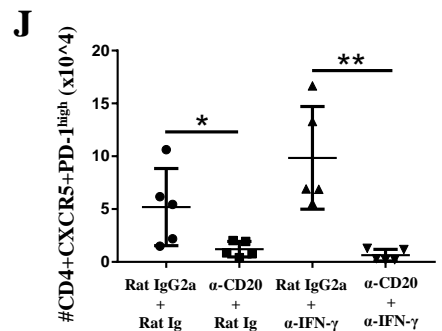

**A**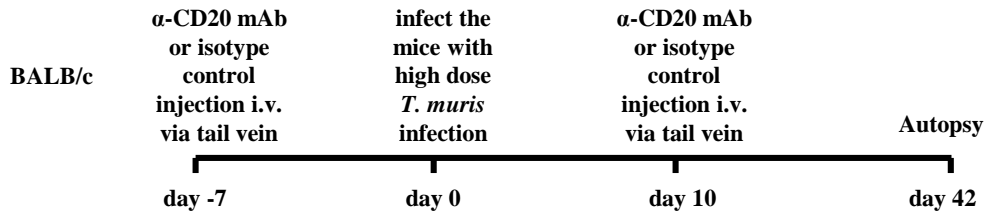**B**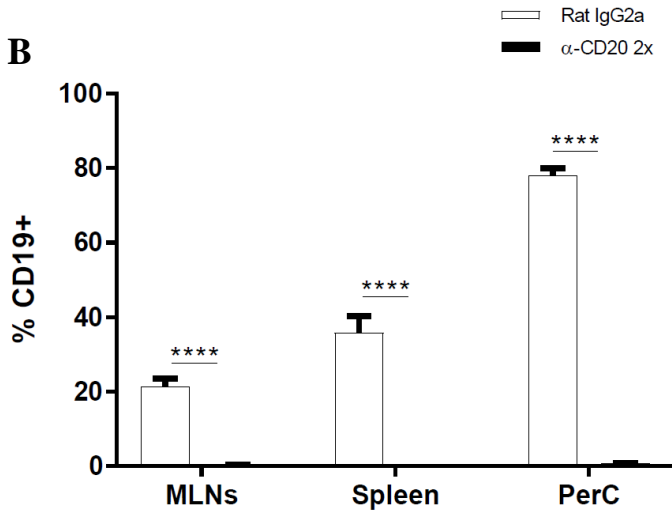**C**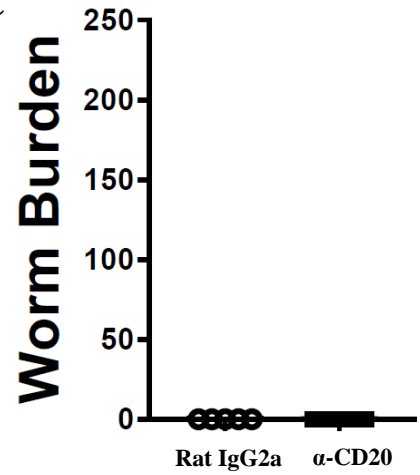**D**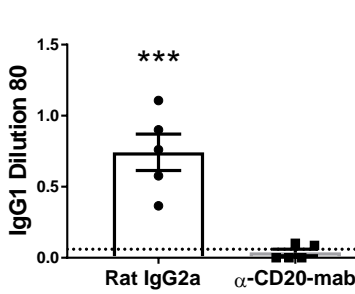**E**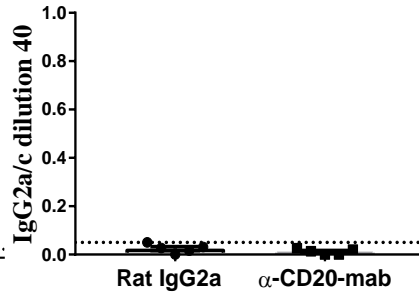**F**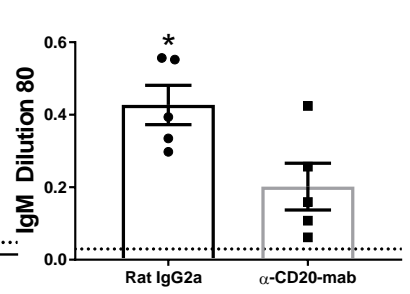

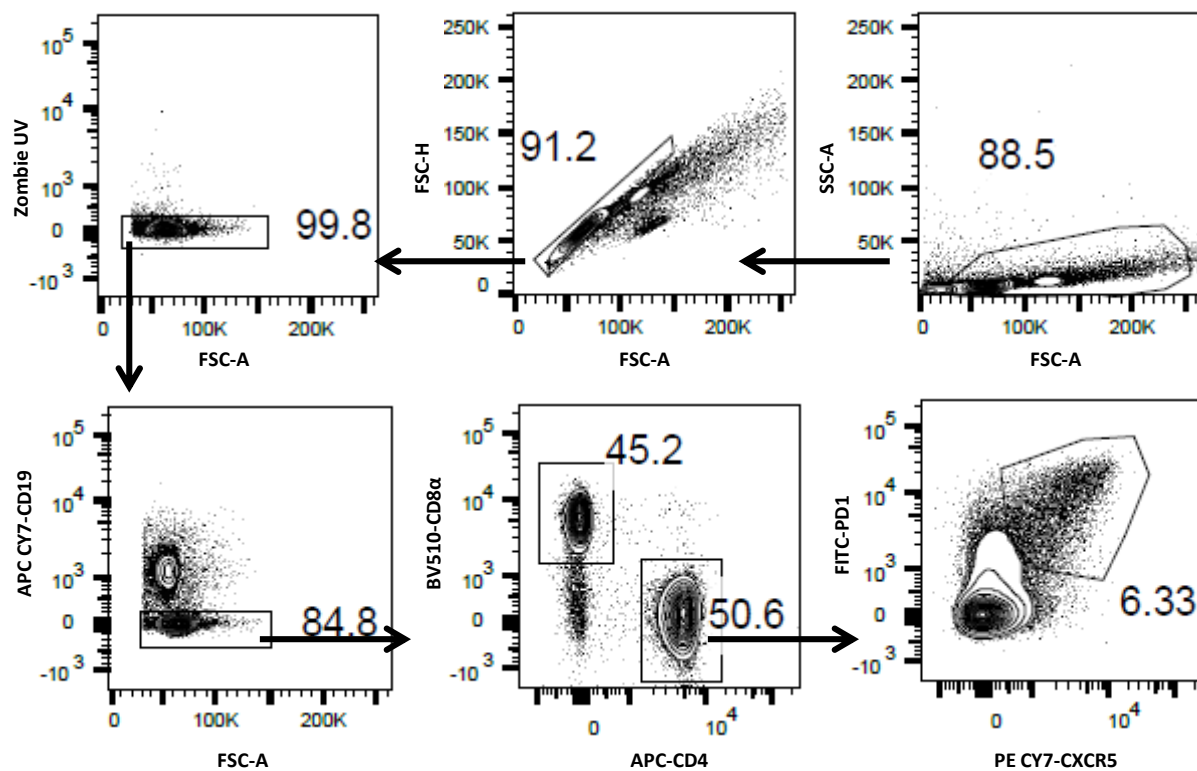

**Supplementary Fig.1. Flow cytometry gating strategy for  $T_{FH}$ .**  $T_{FH}$  cells are defined as  $CD4+CXCR5+PD-1^{high}$

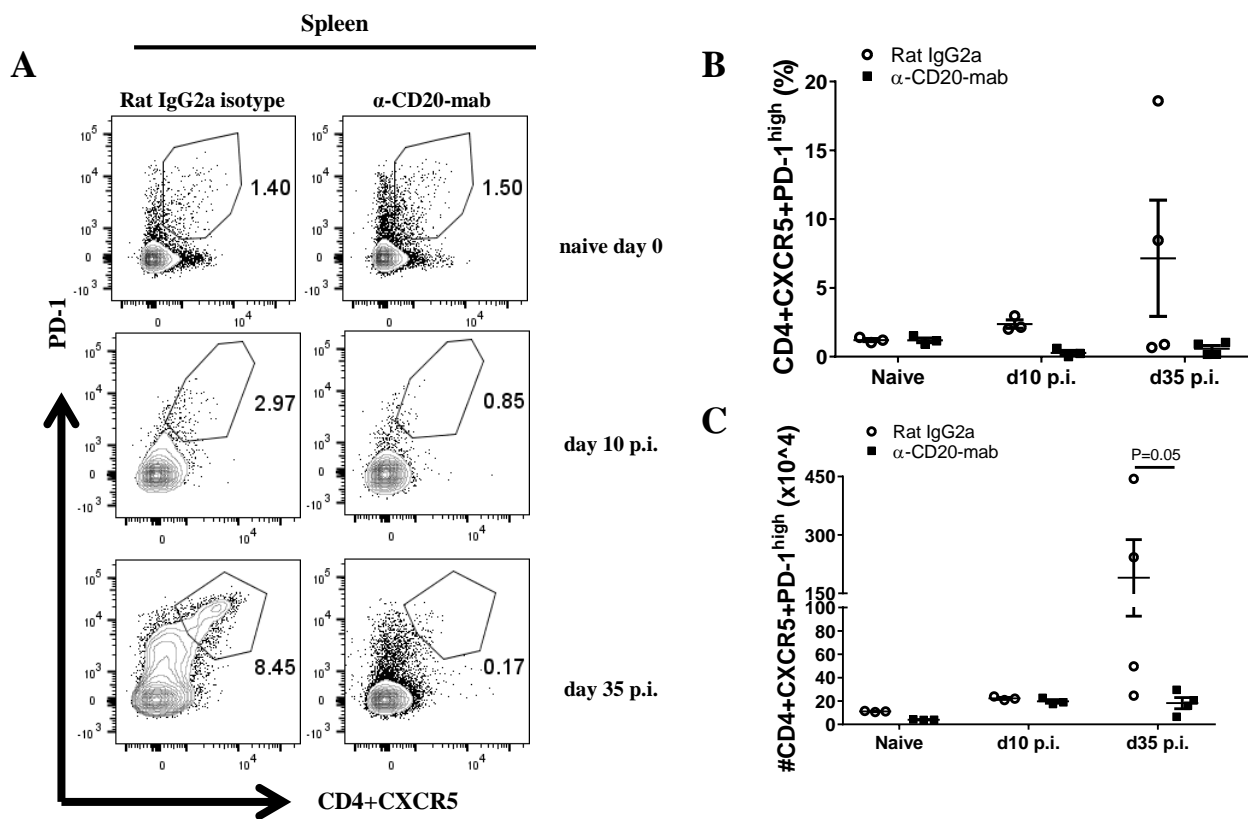

**Supplementary Fig. 2. T<sub>FH</sub> population in the spleen of anti-CD20 mAb treated mice.** C57BL/6 mice were treated with anti CD20 mAb or isotype control 100  $\mu$ g in 200  $\mu$ l PBS i.v. injection via tail vein. Mice were infected with approximately 150 *T. muris* eggs at day 7 post injection. Mice were re-injected with anti CD20 mAb or isotype control 100  $\mu$ g in 200  $\mu$ l PBS i.v. injection via tail vein by day 10 p.i. Mice were autopsied by day 0, day 10 and day 35 p.i. Gating on CD4+CXCR5+PD-1<sup>high</sup> to define T<sub>FH</sub> cells in spleen (A). (B&C) Relative % and total cell number of T<sub>FH</sub> in the spleen, respectively. Data show mean $\pm$ SEM, from 1 experiment, males., \*p<0.05, Mann whitney U test

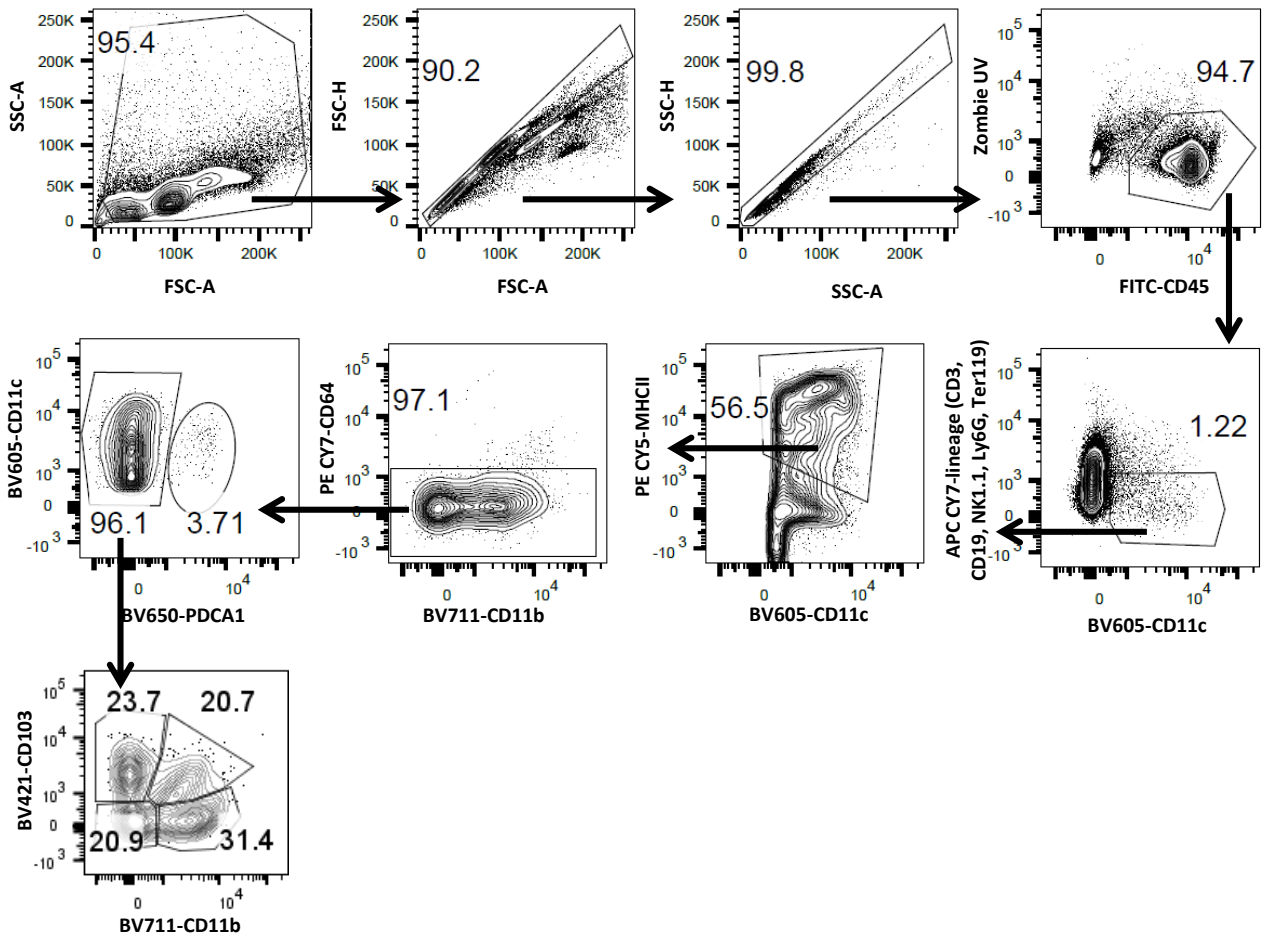

**Supplementary Fig.3. Flow cytometry gating strategy for DC subsets.** DCs are defined as CD45+lineage-CD11c+MHCII+CD64-. Two main DCs populations: conventional DCs (cDCs) and plasmacytoid DCs (pDCs). Conventional DCs (CD45+lineage-CD11c+MHCII+CD64-PDCA1-) were divided into migratory DCs and resident DCs. Migratory DCs was consisted of 4 subpopulations: CD103+CD11b-, CD103+CD11b+, CD103-CD11b+ and CD103-CD11b-. Plasmacytoid DCs: CD45+lineage-CD11c+MHCII+CD64-PDCA1+



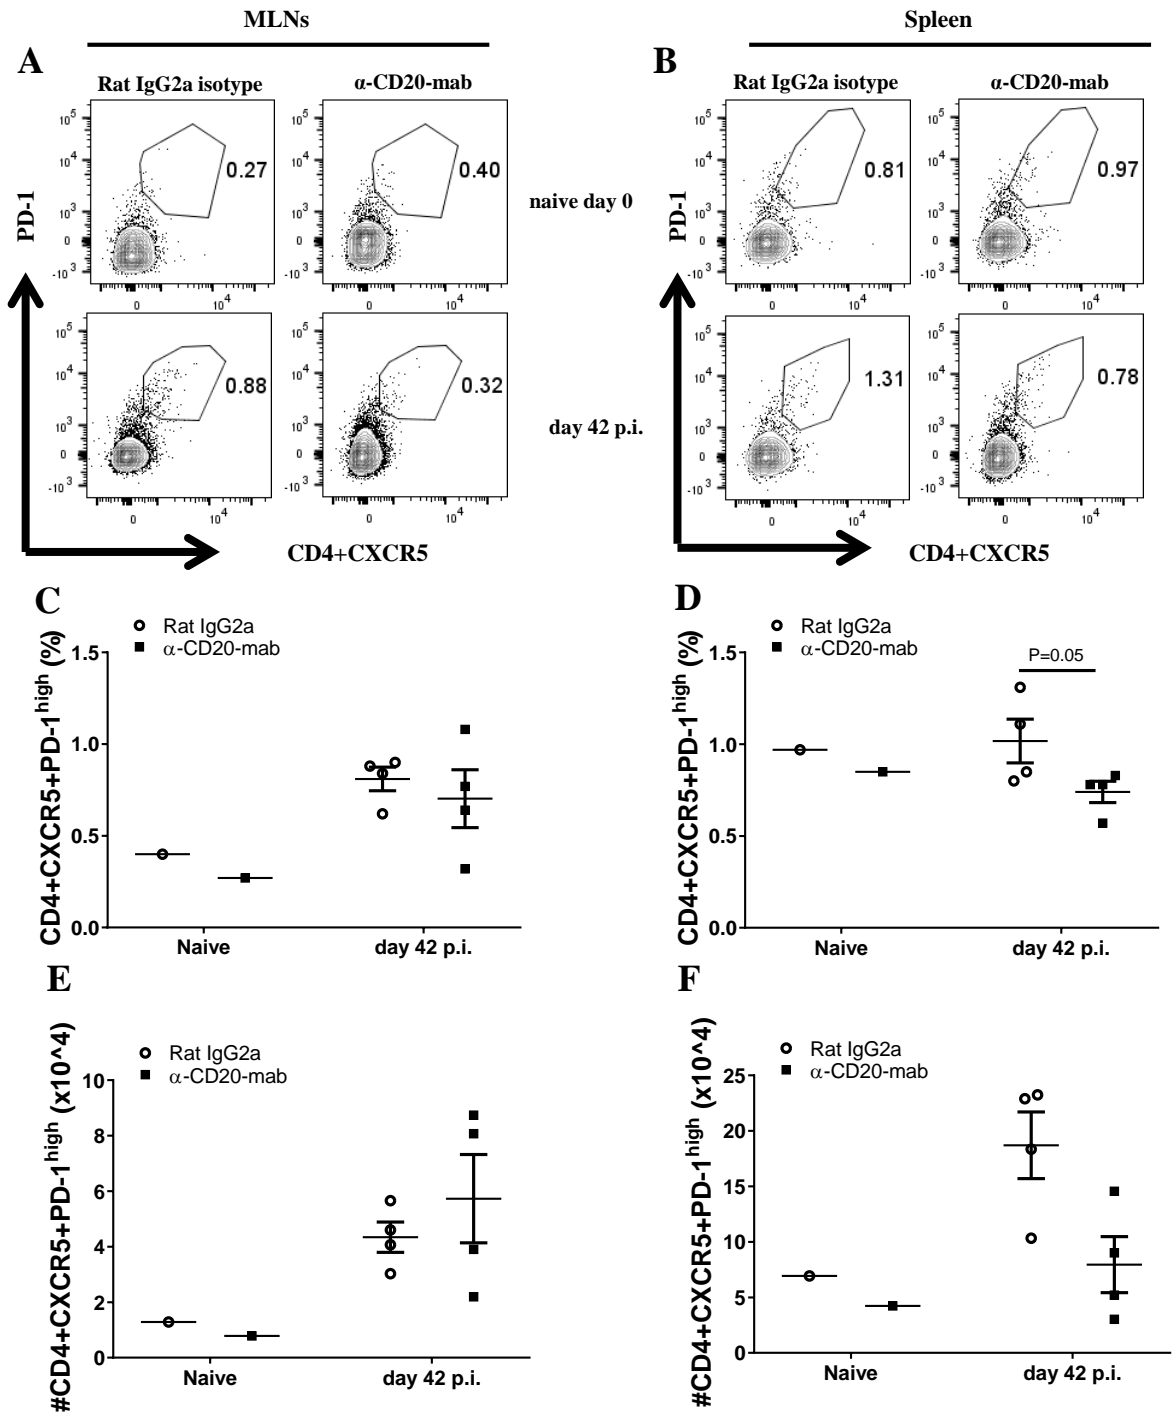

**Supplementary Fig. 4. Tfh population in the MLNs and spleen of anti-CD20 mab treated mice on a Balb/c genetic background were not affected.** Balb/c mice were treated with anti CD20 mab or isotype control 100  $\mu$ g in 200  $\mu$ l PBS i.v. injection via tail vein. Mice were infected with approximately 150 *T. muris* eggs at day 7 post injection. Mice were re-injected with anti CD20 mab or isotype control 100  $\mu$ g in 200  $\mu$ l PBS i.v. injection via tail vein by day 10 p.i. Mice were autopsied by day 0 and day 42 p.i. Gating on CD4+CXCR5+PD-1<sup>high</sup> to define Tfh cells in MLNs (A) and spleen (B). (C&D) Relative % of Tfh in MLNs and spleen, respectively. (E&F) Total Tfh in MLNs and spleen, respectively. . Data show mean $\pm$ SEM, from 1 experiment, males.
